# Supplementary material for: Trends and Disparities in Cardiovascular Disease Burden Among Cancer Deaths in the U.S. (1999–2020): A CDC WONDER Disproportionality Analysis
Source: Research Square preprint supplement (doi:10.21203/rs.3.rs-7776019/v1), 2025-11-11
Supplement: Supplementary file 1 [file ec838859bd2de6cc55d2fcdb.docx]

**Supplementary Material**

**Calculations:**

**CVD Burden in Cancer Population (A/B Ratio)**: The first step involves calculating the burden of CVD within the population of cancer-related deaths. This is done by determining the ratio of deaths where both CVD and cancer are listed on the death certificate (A) to the total number of cancer-related deaths (B):

CVD Burden in Cancer Mortality = A/B = X

Here, A represents the deaths where CVD was documented alongside cancer, capturing the intersection of these two significant causes of mortality. B serves as the denominator, encompassing all cancer-related deaths, thereby contextualizing the burden of CVD within this specific population. The ratio is denoted as X for ease in future steps.

**CVD Burden in Non-Cancer Population [C-A) / (D-B) Adjustment]**: To accurately assess the CVD burden in the non-cancer population, it was critical to exclude the overlap of cancer-related deaths from the overall CVD mortality figures. Consequently, the cancer deaths were excluded from the All-Cause death numbers as well. This adjustment ensures that the calculated burden is exclusively reflective of the non-cancer cohort. The formula used is:

CVD Burden in Non-Cancer = = Y

C represents the total number of deaths where CVD was listed as a cause, while D represents all-cause mortality. Subtracting A from C and B from D removes the influence of cancer deaths, thus providing a clearer picture of CVD burden in the non-cancer population. The ratio is denoted by Y.

**Reporting Odds Ratio (ROR):** The Reporting odds ratio is derived by comparing the CVD burden in the cancer population to the CVD burden in the non-cancer population. This is expressed as:

ROR= CVD Burden in Cancer / CVD Burden in Non-Cancer =

The ROR effectively quantifies how the burden of CVD in cancer patients compares to that in non-cancer patients, after adjusting for the potential overlap in mortality causes. A ROR greater than 1 suggests a higher relative burden of CVD in the cancer population compared to the non-cancer population, while a ROR less than 1 indicates a lower relative burden.

**Supplementary Legend**

**Supplementary Figure 1:** CVD Burden in Malignant Neoplasm-Related Reporting Odds Ratio Stratified by Age Group in the Unites States, 1999-2020

**Supplementary Figure 2:** CVD Burden in Malignant Neoplasm-Related Reporting Odds Ratio Stratified by Sex and Age Group in the Unites States, 1999-2020

**Supplementary Figure 3:** CVD Burden in Malignant Neoplasm-Related Reporting Odds Ratio Stratified by Region and Age Group in the Unites States, 1999-2020

**Supplementary Figure 4:** CVD Burden in Malignant Neoplasm-Related Reporting Odds Ratio Stratified by Race and Age Group in the Unites States, 1999-2020

**Supplementary Figure 5:** CVD Burden in Malignant Neoplasm-Related Reporting Odds Ratio Stratified by Urbanization and Age Group in the Unites States, 1999-2020

**Supplementary Table 1:** Total Deaths and Reporting Odds Ratio of CVD Burden in Malignant Cancers in Individuals aged 15-85+ in United States from 1999-2020

**Supplemental Table 2**: Average Annual percent change (AAPC) of CVD Burden in Malignant Cancer, related Reporting Odds Ratio in the United States, 1999 to 2020

**Supplemental Table 3:** CVD Burden in Malignant Neoplasm and Non-Malignant Neoplasm Deaths-Related Proportions across Age Groups Age Group in the Unites States, 1999-2020

**Supplemental Table 4** CVD Burden in Malignant Neoplasm-Related Reporting Odds Ratio Stratified by Sex and Urbanization in the Unites States, 1999-2020

**Supplemental Table 5** CVD Burden in Malignant Neoplasm-Related Reporting Odds Ratio Stratified by Census Regions in the Unites States, 1999-2020

**Supplemental Table 6** CVD Burden in Malignant Neoplasm-Related Reporting Odds Ratio Stratified by Race in the Unites States, 1999-2020

**Supplemental Table 7** CVD Burden in Malignant Neoplasm-Related Reporting Odds Ratio Stratified by Place of Death in the Unites States, 1999-2020


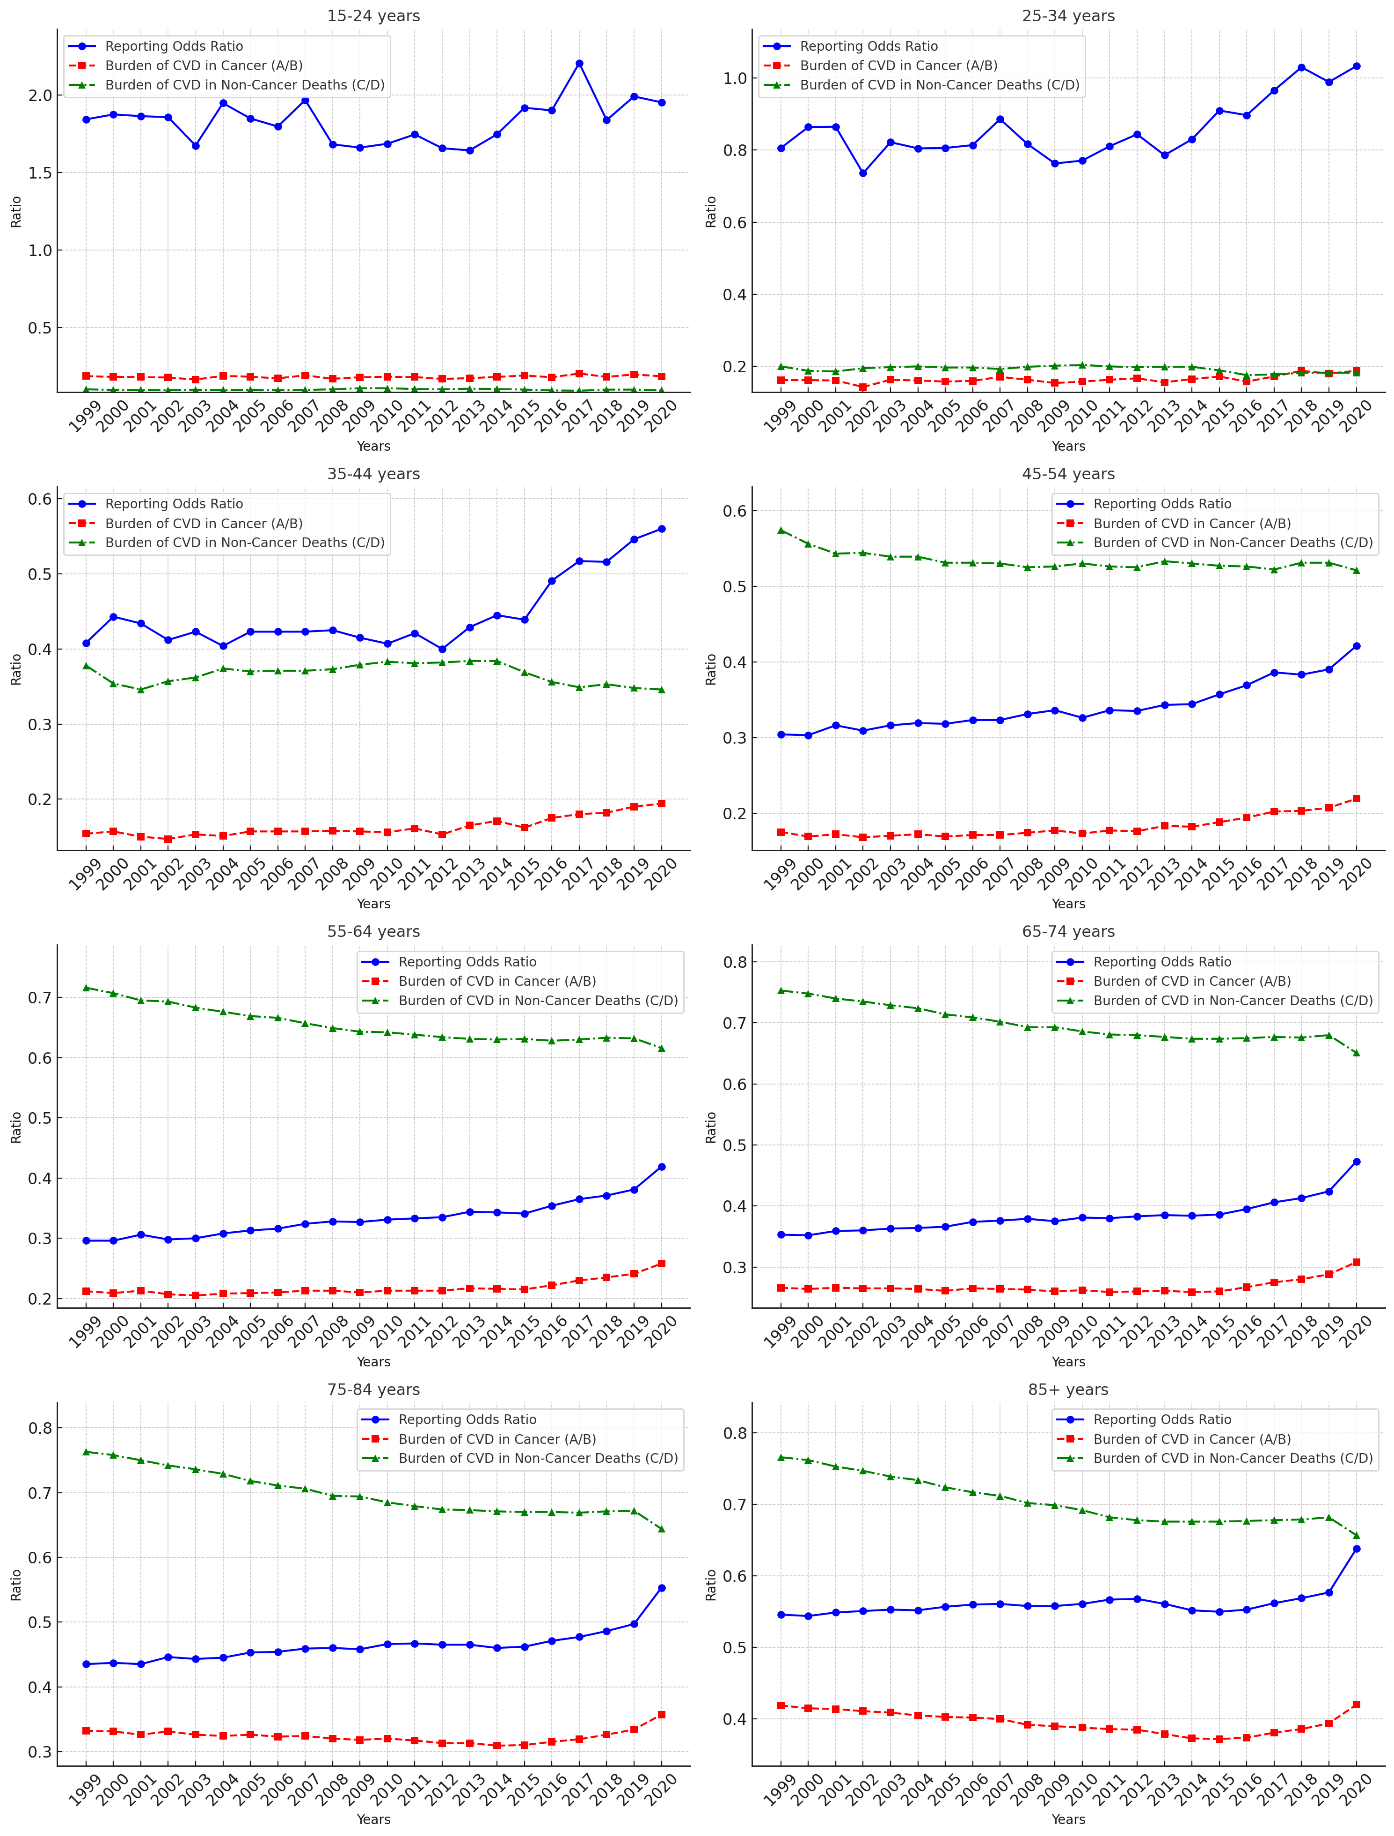
**Supplementary Figure 1:** CVD Burden in Malignant Neoplasm-Related Reporting Odds Ratio Stratified by Age Group in the Unites States, 1999-2020


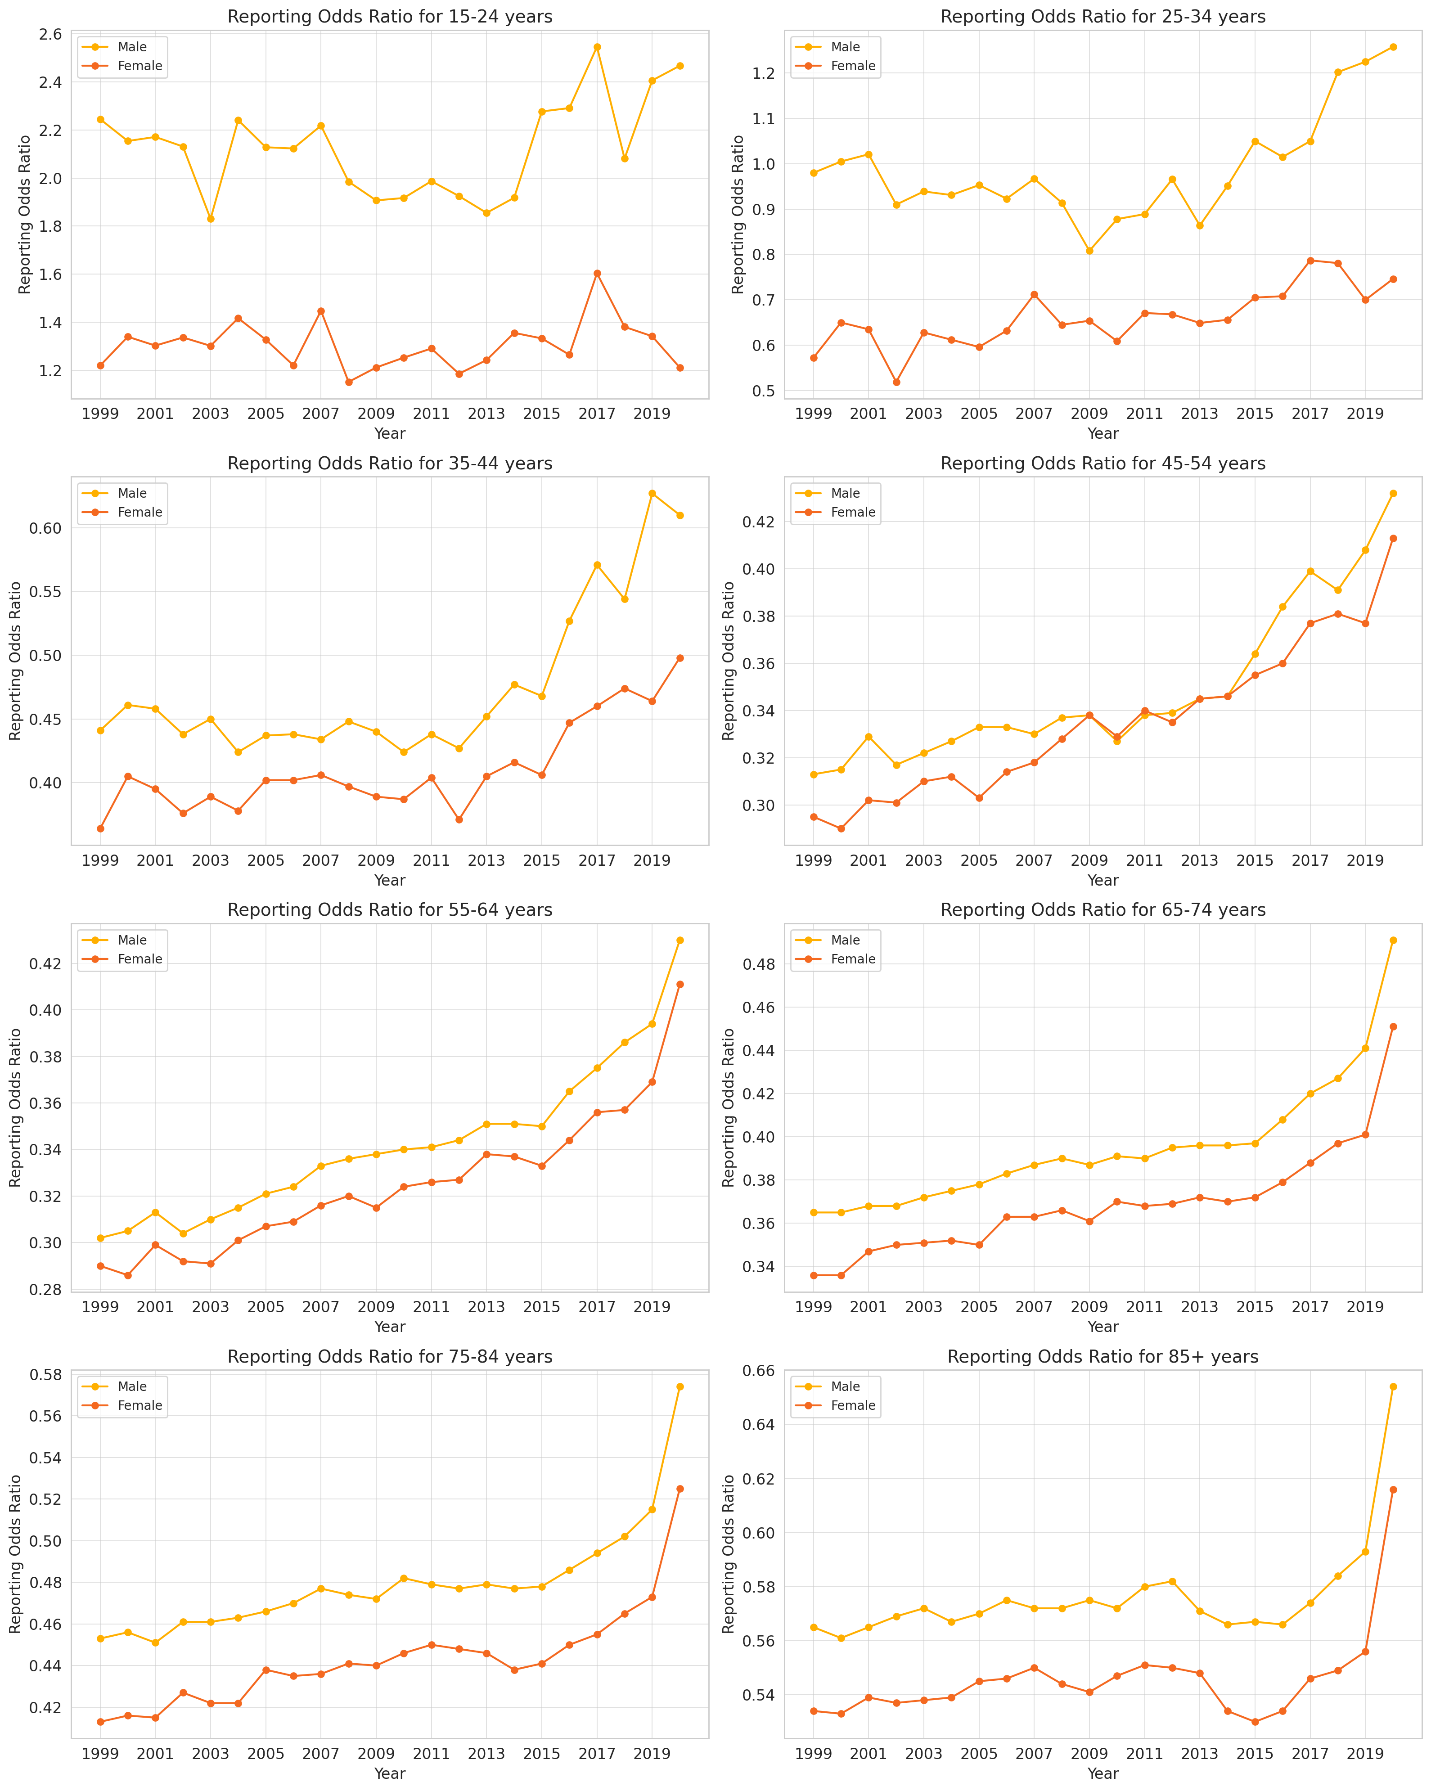


**Supplementary Figure 2:** CVD Burden in Malignant Neoplasm-Related Reporting Odds Ratio Stratified by Sex and Age Group in the Unites States, 1999-2020

**
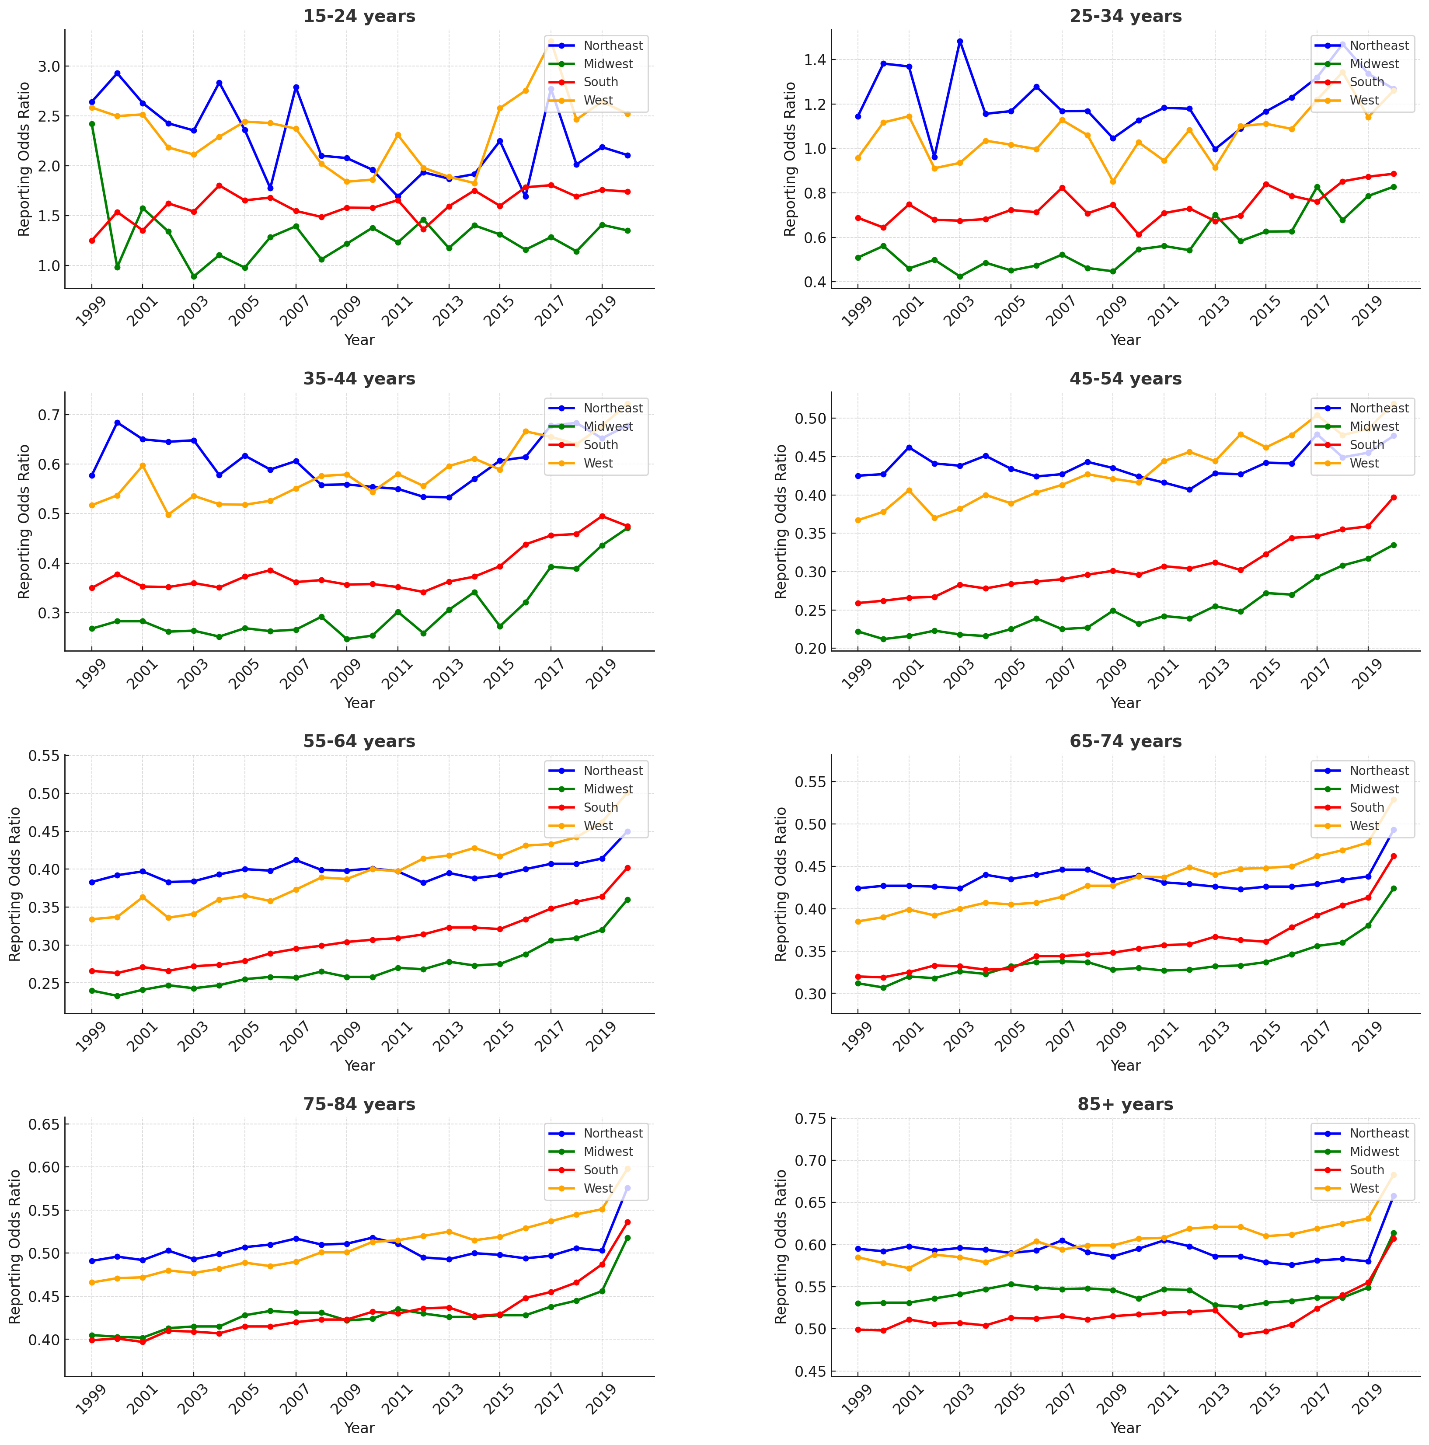
**

**Supplementary Figure 3:** CVD Burden in Malignant Neoplasm-Related Reporting Odds Ratio Stratified by Region and Age Group in the Unites States, 1999-2020

**
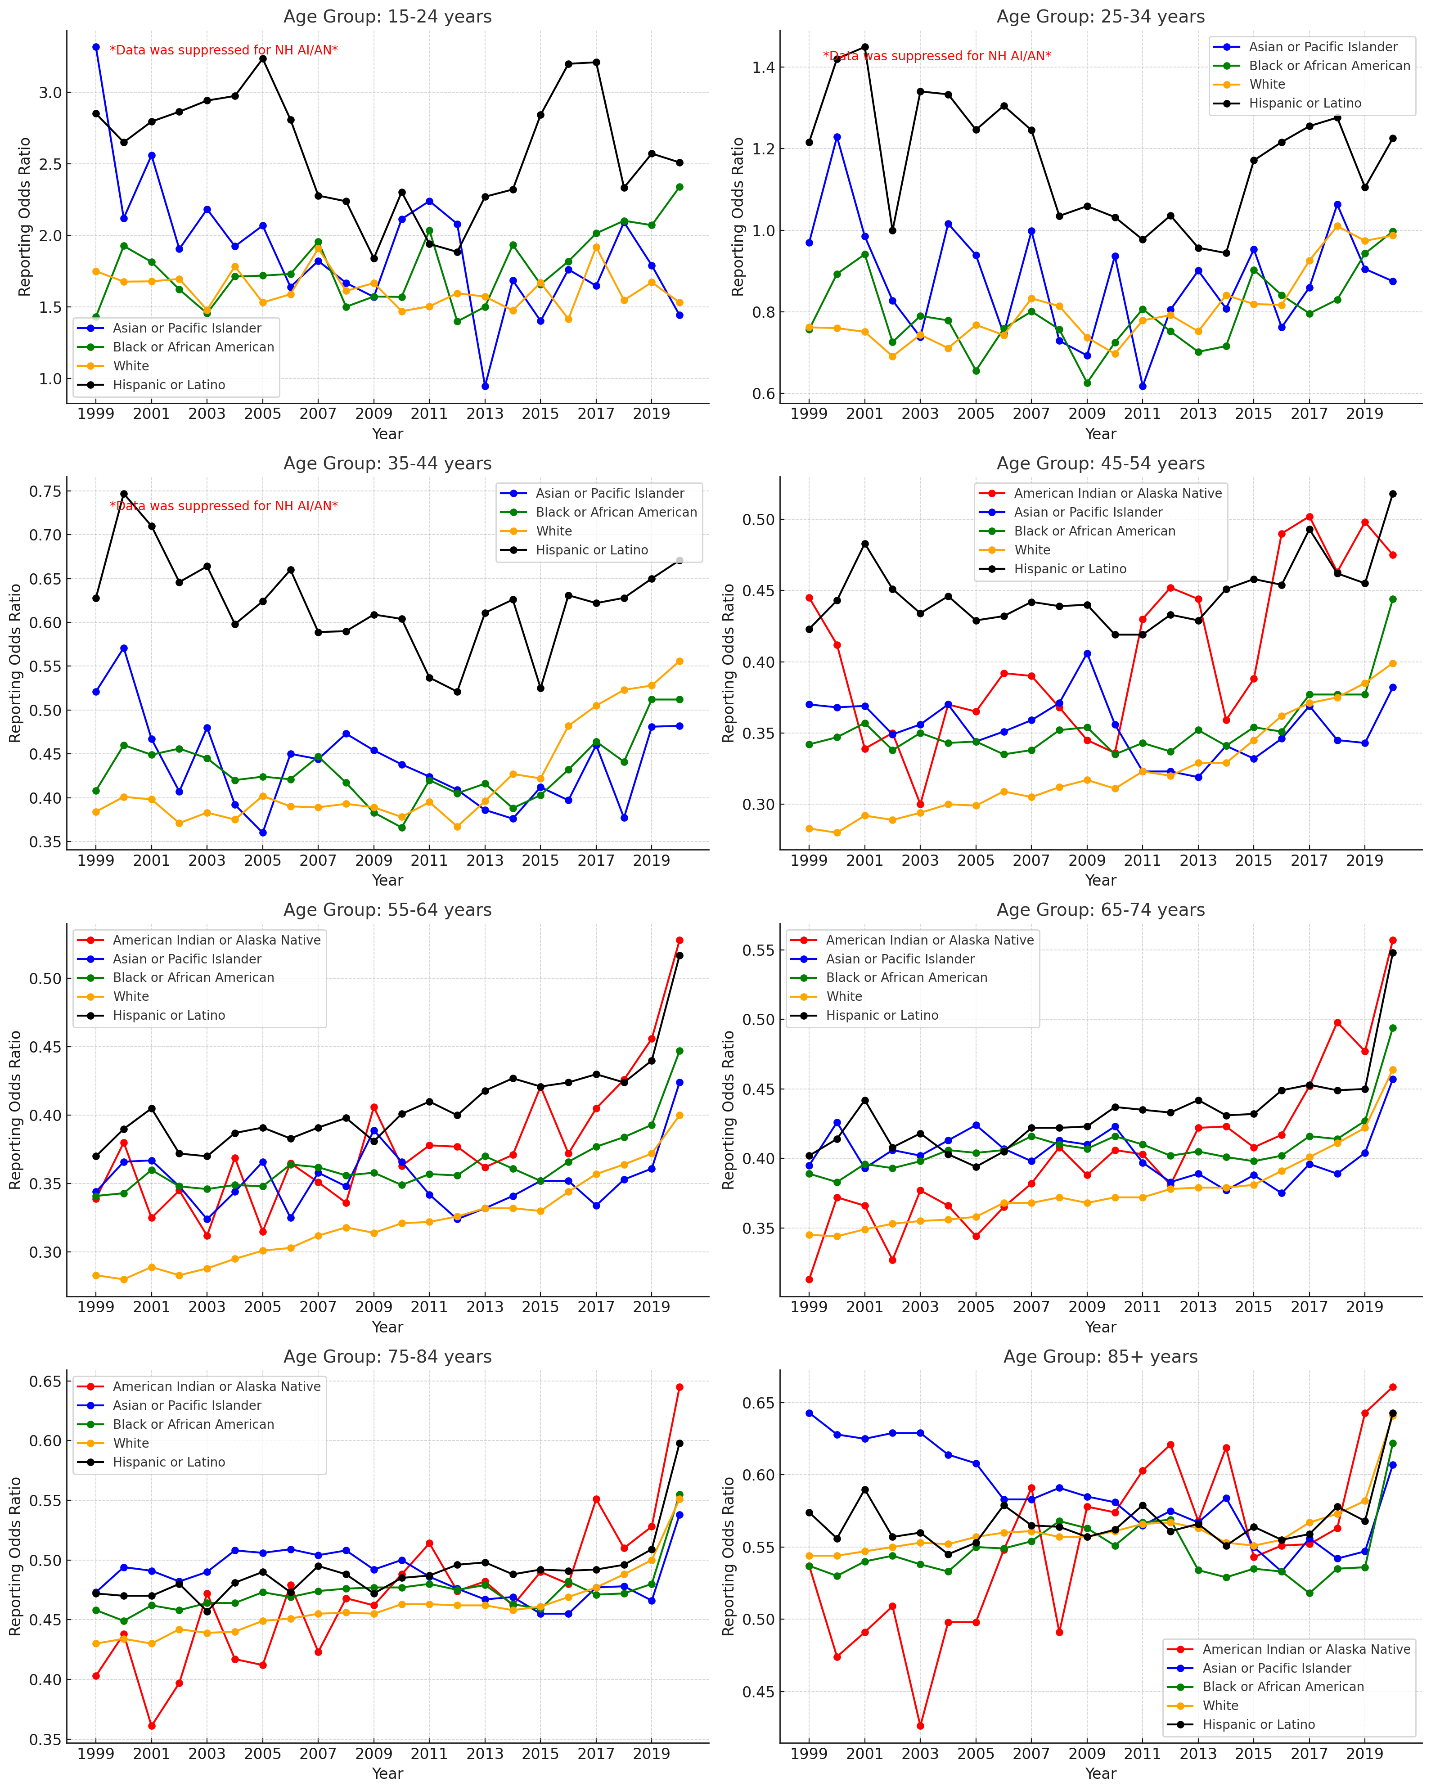
**

**Supplementary Figure 4:** CVD Burden in Malignant Neoplasm-Related Reporting Odds Ratio Stratified by Race and Age Group in the Unites States, 1999-2020


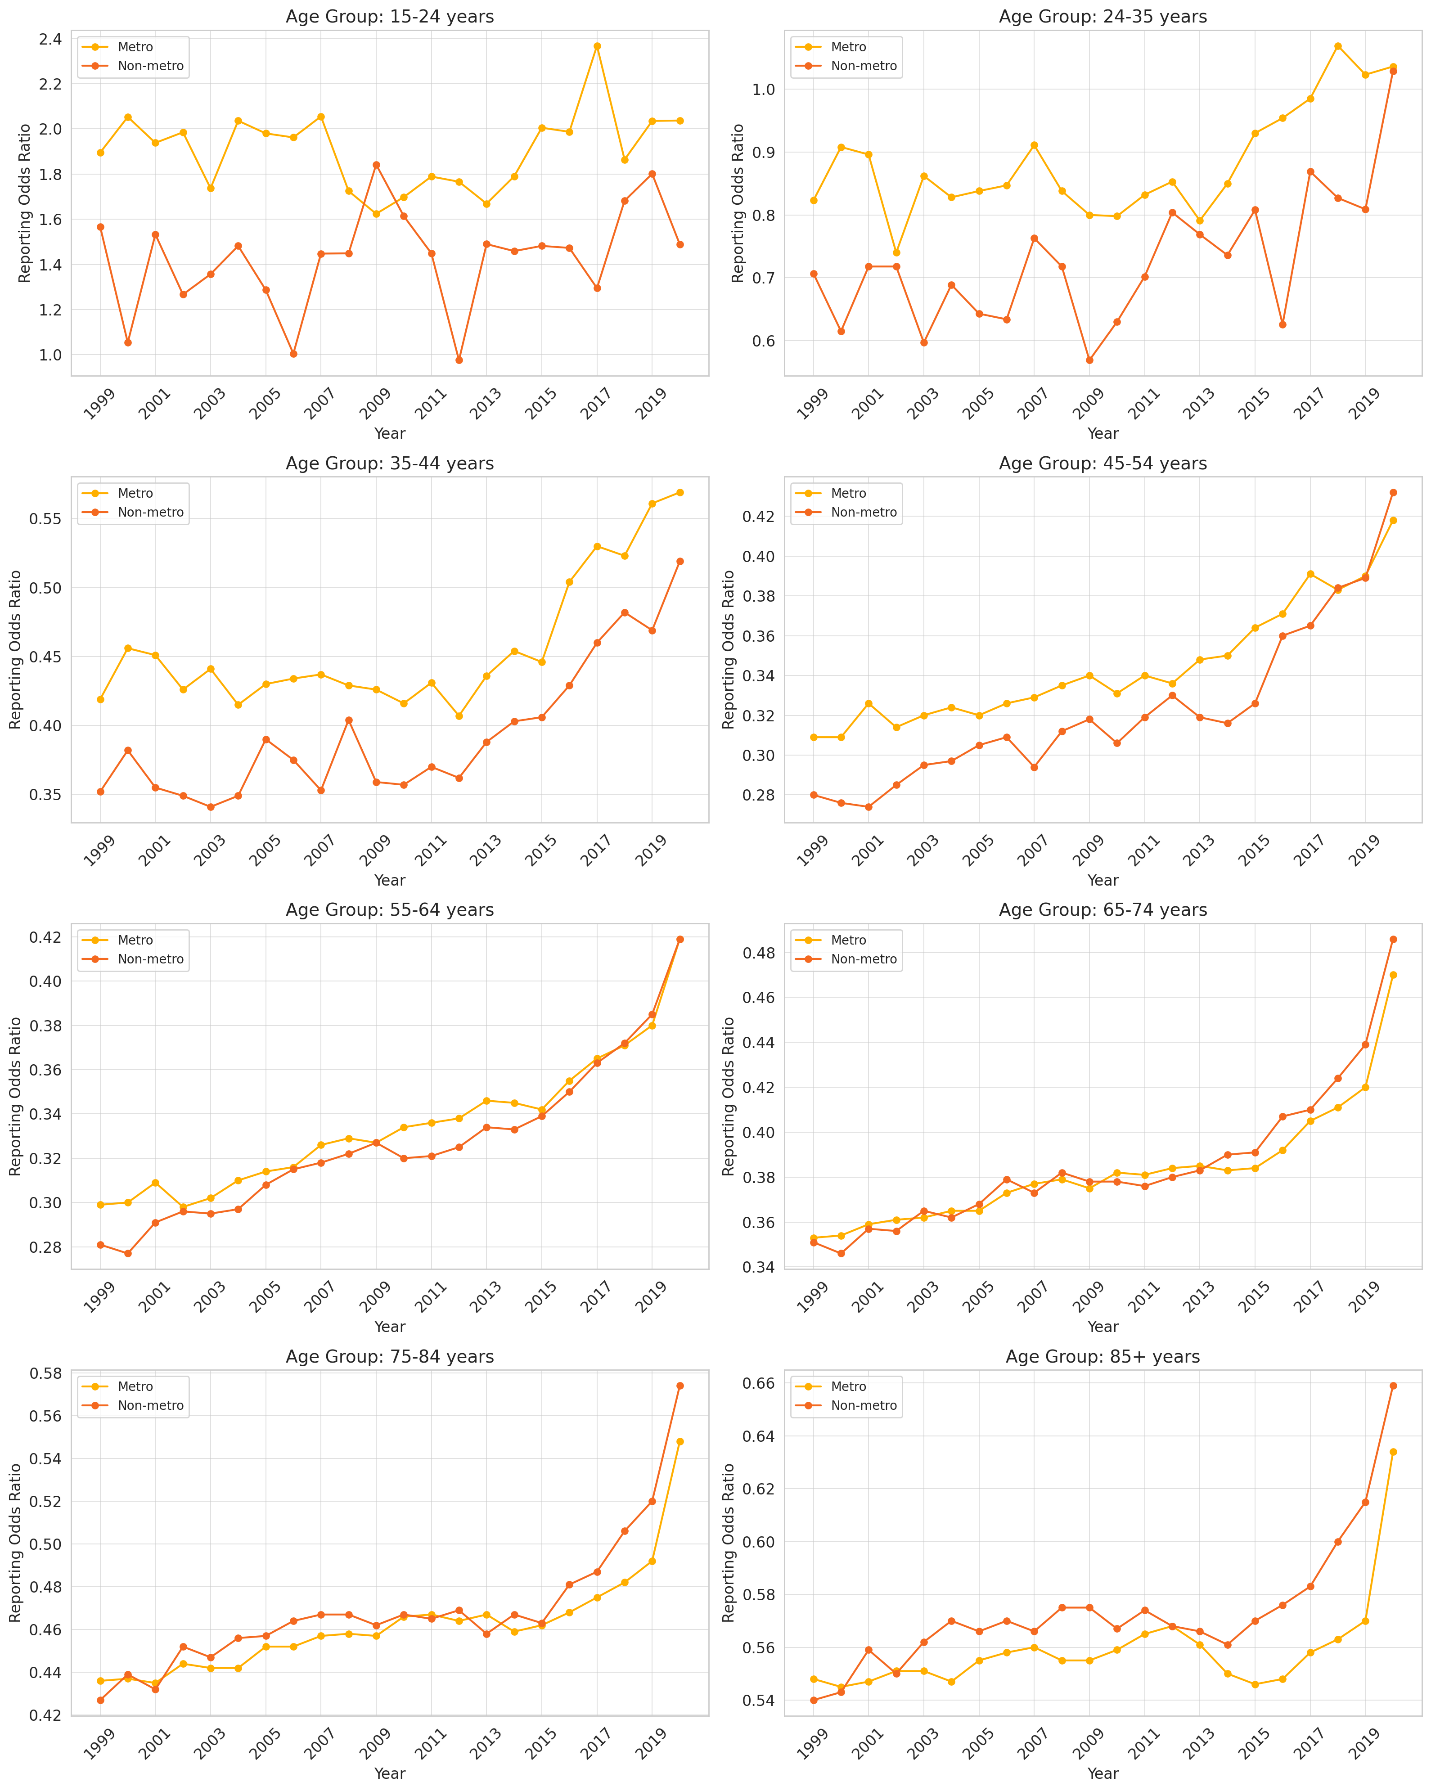


**Supplementary Figure 5:** CVD Burden in Malignant Neoplasm-Related Reporting Odds Ratio Stratified by Urbanization and Age Group in the Unites States, 1999-2020

| **Supplementary Table 1: Total Deaths and Reporting Odds Ratio of CVD Burden in Malignant Cancers in Individuals aged 15-85+ in United States from 1999-2020** | | | | | | | |
| --- | --- | --- | --- | --- | --- | --- | --- |
| **Deaths and Reporting Odds Ratio (95% CI)** | | | | | | | |
| **Cohort** | **Cancer and CVD Deaths (A)** | **Total Cancer Deaths (B)** | **Total CVD Deaths (C)** | **Total Non-Cancer Deaths (D)** | **A/B** | **C/D** | **ROR (95% CI)** |
| **15-24 Age Group** | | | | | | | |
| Overall | 6562 | 36257 | 65370 | 660222 | 0.181 | 0.099 | 1.828 (1.778-1.879) |
| Female | 2591 | 14455 | 23123 | 168416 | 0.179 | 0.137 | 1.306 (1.249-1.364) |
| Male | 3971 | 21802 | 42247 | 491806 | 0.182 | 0.086 | 2.12 (2.047-2.196) |
| NH American Indian | 44 | 321 | 891 | 11460 | 0.137 | 0.078 | 1.763 (1.277-2.434) |
| NH Asian Pacific | 377 | 1629 | 1977 | 15877 | 0.231 | 0.125 | 1.859 (1.646-2.098) |
| NH Black | 1194 | 5880 | 17311 | 150316 | 0.203 | 0.115 | 1.763 (1.654-1.88) |
| NH White | 3210 | 20636 | 35313 | 369124 | 0.156 | 0.096 | 1.626 (1.564-1.69) |
| Hispanic | 1727 | 7706 | 9721 | 110960 | 0.224 | 0.088 | 2.558 (2.418-2.706) |
| Northeast | 1462 | 6118 | 9868 | 93104 | 0.239 | 0.106 | 2.255 (2.122-2.396) |
| Midwest | 895 | 7632 | 13430 | 144097 | 0.117 | 0.093 | 1.258 (1.171-1.351) |
| South | 2172 | 13369 | 28229 | 279205 | 0.162 | 0.101 | 1.607 (1.533-1.684) |
| West | 2033 | 9138 | 13843 | 143816 | 0.222 | 0.096 | 2.311 (2.196-2.433) |
| Metro | 5763 | 30782 | 53108 | 540515 | 0.187 | 0.098 | 1.905 (1.85-1.963) |
| Non metro | 799 | 5475 | 12262 | 119707 | 0.146 | 0.102 | 1.425 (1.32-1.538) |
| **25-34 Age Group** | | | | | | | |
| Overall | 13987 | 84925 | 183682 | 958118 | 0.165 | 0.192 | 0.859 (0.843-0.875) |
| Female | 6929 | 43307 | 66281 | 274566 | 0.160 | 0.241 | 0.663 (0.645-0.681) |
| Male | 7058 | 41618 | 117401 | 683552 | 0.170 | 0.172 | 0.987 (0.962-1.013) |
| NH American Indian | 113 | 704 | 3134 | 18095 | 0.161 | 0.173 | 0.927 (0.757-1.134) |
| NH Asian Pacific | 835 | 4139 | 5002 | 21588 | 0.202 | 0.232 | 0.871 (0.803-0.944) |
| NH Black | 2857 | 14922 | 51333 | 213918 | 0.191 | 0.240 | 0.798 (0.766-0.831) |
| NH White | 7209 | 50670 | 99350 | 563264 | 0.142 | 0.176 | 0.807 (0.786-0.828) |
| Hispanic | 2931 | 14296 | 24336 | 138052 | 0.205 | 0.176 | 1.163 (1.115-1.213) |
| Northeast | 3215 | 14088 | 27093 | 148187 | 0.228 | 0.183 | 1.248 (1.199-1.3) |
| Midwest | 1889 | 17867 | 37131 | 200611 | 0.106 | 0.185 | 0.571 (0.544-0.6) |
| South | 4870 | 33217 | 81183 | 409401 | 0.147 | 0.198 | 0.739 (0.717-0.763) |
| West | 4013 | 19753 | 38275 | 199919 | 0.203 | 0.191 | 1.061 (1.024-1.1) |
| Metro | 12124 | 72200 | 151277 | 798320 | 0.168 | 0.189 | 0.886 (0.869-0.904) |
| Non metro | 1863 | 12725 | 32405 | 159798 | 0.146 | 0.203 | 0.722 (0.687-0.759) |
| **35-44 Age Group** | | | | | | | |
| Overall | 47969 | 296962 | 543345 | 1486387 | 0.162 | 0.366 | 0.442 (0.437-0.446) |
| Female | 26283 | 166815 | 189759 | 491119 | 0.158 | 0.386 | 0.408 (0.402-0.414) |
| Male | 21686 | 130147 | 353586 | 995268 | 0.167 | 0.355 | 0.469 (0.462-0.476) |
| NH American Indian | 325 | 2130 | 7806 | 25341 | 0.153 | 0.308 | 0.495 (0.44-0.558) |
| NH Asian Pacific | 2550 | 12799 | 13515 | 29586 | 0.199 | 0.457 | 0.436 (0.416-0.457) |
| NH Black | 10273 | 53102 | 142842 | 317853 | 0.193 | 0.449 | 0.43 (0.421-0.44) |
| NH White | 27129 | 192627 | 318687 | 936174 | 0.141 | 0.340 | 0.414 (0.408-0.419) |
| Hispanic | 7554 | 35636 | 58527 | 171409 | 0.212 | 0.341 | 0.621 (0.605-0.638) |
| Northeast | 11373 | 52204 | 82930 | 233648 | 0.218 | 0.355 | 0.614 (0.601-0.627) |
| Midwest | 6948 | 64160 | 112043 | 307989 | 0.108 | 0.364 | 0.298 (0.29-0.305) |
| South | 17166 | 119408 | 241162 | 641318 | 0.144 | 0.376 | 0.382 (0.376-0.389) |
| West | 12482 | 61190 | 107210 | 303432 | 0.204 | 0.353 | 0.577 (0.566-0.589) |
| Metro | 40974 | 249506 | 444379 | 1226476 | 0.164 | 0.362 | 0.453 (0.448-0.458) |
| Non metro | 6995 | 47456 | 98966 | 259911 | 0.147 | 0.381 | 0.387 (0.377-0.397) |
| **45-54 Age Group** | | | | | | | |
| Overall | 190288 | 1057619 | 1498419 | 2812063 | 0.180 | 0.533 | 0.338 (0.336-0.339) |
| Female | 91745 | 526373 | 501042 | 957406 | 0.174 | 0.523 | 0.333 (0.33-0.336) |
| Male | 98543 | 531246 | 997377 | 1854657 | 0.185 | 0.538 | 0.345 (0.342-0.347) |
| NH American Indian | 1310 | 7174 | 16689 | 36927 | 0.183 | 0.452 | 0.404 (0.38-0.43) |
| NH Asian Pacific | 7576 | 34145 | 32328 | 51554 | 0.222 | 0.627 | 0.354 (0.344-0.364) |
| NH Black | 38774 | 178471 | 349353 | 565958 | 0.217 | 0.617 | 0.352 (0.348-0.356) |
| NH White | 122360 | 750181 | 962908 | 1890237 | 0.163 | 0.509 | 0.32 (0.318-0.322) |
| Hispanic | 19674 | 84948 | 130823 | 254198 | 0.232 | 0.515 | 0.45 (0.442-0.458) |
| Northeast | 44281 | 189490 | 238717 | 449254 | 0.234 | 0.531 | 0.44 (0.435-0.445) |
| Midwest | 31435 | 240243 | 318222 | 596834 | 0.131 | 0.533 | 0.245 (0.242-0.248) |
| South | 69983 | 425741 | 649671 | 1198020 | 0.164 | 0.542 | 0.303 (0.301-0.306) |
| West | 44589 | 202145 | 291809 | 567955 | 0.221 | 0.514 | 0.429 (0.425-0.434) |
| Metro | 158220 | 872957 | 1220843 | 2302610 | 0.181 | 0.530 | 0.342 (0.34-0.344) |
| Non metro | 32068 | 184662 | 277576 | 509453 | 0.174 | 0.545 | 0.319 (0.315-0.323) |
| **55-64 Age Group** | | | | | | | |
| Overall | 533148 | 2446534 | 2880808 | 4438505 | 0.218 | 0.649 | 0.336 (0.335-0.337) |
| Female | 225042 | 1097885 | 1014334 | 1620489 | 0.205 | 0.626 | 0.327 (0.326-0.329) |
| Male | 308106 | 1348649 | 1866474 | 2818016 | 0.228 | 0.662 | 0.345 (0.396-0.399) |
| NH American Indian | 3453 | 15174 | 25835 | 43764 | 0.228 | 0.590 | 0.385 (0.37-0.401) |
| NH Asian Pacific | 15838 | 62222 | 60500 | 84165 | 0.255 | 0.719 | 0.354 (0.347-0.361) |
| NH Black | 94541 | 360762 | 571730 | 797069 | 0.262 | 0.717 | 0.365 (0.362-0.368) |
| NH White | 378436 | 1855976 | 1997909 | 3165194 | 0.204 | 0.631 | 0.323 (0.322-0.324) |
| Hispanic | 39216 | 146098 | 211575 | 327314 | 0.268 | 0.646 | 0.415 (0.41-0.42) |
| Northeast | 116493 | 438627 | 469658 | 709830 | 0.266 | 0.662 | 0.401 (0.398-0.404) |
| Midwest | 98132 | 561280 | 620856 | 968045 | 0.175 | 0.641 | 0.273 (0.271-0.275) |
| South | 198618 | 977943 | 1231579 | 1890036 | 0.203 | 0.652 | 0.312 (0.31-0.313) |
| West | 119905 | 468684 | 558715 | 870594 | 0.256 | 0.642 | 0.399 (0.396-0.402) |
| Metro | 433997 | 1984755 | 2315330 | 3571528 | 0.219 | 0.648 | 0.337 (0.336-0.339) |
| Non metro | 99151 | 461779 | 565478 | 866977 | 0.215 | 0.652 | 0.329 (0.327-0.332) |
| **65-74 Age Group** | | | | | | | |
| Overall | 967400 | 3610827 | 4469361 | 6423461 | 0.268 | 0.696 | 0.385 (0.384-0.386) |
| Female | 398201 | 1602068 | 1846393 | 2746830 | 0.249 | 0.672 | 0.37 (0.368-0.371) |
| Male | 569199 | 2008759 | 2622968 | 3676631 | 0.283 | 0.713 | 0.397 (0.396-0.399) |
| NH American Indian | 5152 | 18524 | 31087 | 46218 | 0.278 | 0.673 | 0.413 (0.4-0.428) |
| NH Asian Pacific | 24544 | 80545 | 99229 | 131371 | 0.305 | 0.755 | 0.403 (0.397-0.41) |
| NH Black | 130999 | 420747 | 673352 | 889072 | 0.311 | 0.757 | 0.411 (0.408-0.414) |
| NH White | 746906 | 2901437 | 3362250 | 4934270 | 0.257 | 0.681 | 0.378 (0.377-0.379) |
| Hispanic | 57164 | 181283 | 287034 | 399670 | 0.315 | 0.718 | 0.439 (0.434-0.444) |
| Northeast | 209063 | 666835 | 782109 | 1087509 | 0.314 | 0.719 | 0.436 (0.433-0.438) |
| Midwest | 193213 | 836922 | 982897 | 1443518 | 0.231 | 0.681 | 0.339 (0.337-0.341) |
| South | 350100 | 1407715 | 1846229 | 2678775 | 0.249 | 0.689 | 0.361 (0.359-0.362) |
| West | 215024 | 699355 | 858126 | 1213659 | 0.315 | 0.718 | 0.435 (0.432-0.437) |
| Metro | 776507 | 2897225 | 3548706 | 5091017 | 0.268 | 0.697 | 0.385 (0.383-0.386) |
| Non metro | 190893 | 713602 | 920655 | 1332444 | 0.268 | 0.691 | 0.387 (0.385-0.389) |
| **75-84 Age Group** | | | | | | | |
| Overall | 1280687 | 3956872 | 7530951 | 10766350 | 0.324 | 0.699 | 0.463 (0.462-0.464) |
| Female | 559346 | 1840508 | 3815641 | 5541541 | 0.304 | 0.689 | 0.441 (0.44-0.443) |
| Male | 721341 | 2116364 | 3715310 | 5224809 | 0.341 | 0.711 | 0.479 (0.478-0.481) |
| NH American Indian | 4734 | 14379 | 32037 | 46691 | 0.329 | 0.686 | 0.48 (0.463-0.497) |
| NH Asian Pacific | 30580 | 83477 | 161192 | 214248 | 0.366 | 0.752 | 0.487 (0.48-0.494) |
| NH Black | 125477 | 353362 | 758976 | 1014043 | 0.355 | 0.748 | 0.474 (0.471-0.478) |
| NH White | 1053419 | 3321921 | 6162078 | 8922171 | 0.317 | 0.691 | 0.459 (0.458-0.46) |
| Hispanic | 63840 | 176472 | 398775 | 544738 | 0.362 | 0.732 | 0.494 (0.489-0.499) |
| Northeast | 294639 | 801863 | 1481300 | 2038057 | 0.367 | 0.727 | 0.506 (0.503-0.508) |
| Midwest | 276055 | 941751 | 1730993 | 2531034 | 0.293 | 0.684 | 0.429 (0.427-0.431) |
| South | 422374 | 1426935 | 2855133 | 4165469 | 0.296 | 0.685 | 0.432 (0.43-0.433) |
| West | 287619 | 786323 | 1463525 | 2031790 | 0.366 | 0.720 | 0.508 (0.505-0.51) |
| Metro | 1034994 | 3206437 | 6028719 | 8615342 | 0.323 | 0.700 | 0.461 (0.46-0.462) |
| Non metro | 245693 | 750435 | 1502232 | 2151008 | 0.327 | 0.698 | 0.469 (0.466-0.471) |
| **85+ Age Group** | | | | | | | |
| Overall | 957197 | 2427137 | 10205477 | 14551863 | 0.394 | 0.701 | 0.562 (0.561-0.564) |
| Female | 491102 | 1289356 | 6691033 | 9594400 | 0.381 | 0.697 | 0.546 (0.544-0.548) |
| Male | 466095 | 1137781 | 3514444 | 4957463 | 0.410 | 0.709 | 0.578 (0.576-0.58) |
| NH American Indian | 2249 | 5956 | 24723 | 36716 | 0.378 | 0.673 | 0.561 (0.533-0.59) |
| NH Asian Pacific | 21021 | 49258 | 205412 | 279258 | 0.427 | 0.736 | 0.58 (0.57-0.59) |
| NH Black | 70780 | 178906 | 714720 | 990824 | 0.396 | 0.721 | 0.548 (0.543-0.554) |
| NH White | 821997 | 2093608 | 8811478 | 12625005 | 0.393 | 0.698 | 0.563 (0.561-0.564) |
| Hispanic | 39443 | 95469 | 430671 | 594386 | 0.413 | 0.725 | 0.57 (0.563-0.577) |
| Northeast | 232600 | 536664 | 2252255 | 3090418 | 0.433 | 0.729 | 0.595 (0.592-0.598) |
| Midwest | 222272 | 595580 | 2474128 | 3603835 | 0.373 | 0.687 | 0.544 (0.541-0.546) |
| South | 279007 | 788724 | 3420306 | 5019116 | 0.354 | 0.681 | 0.519 (0.517-0.521) |
| West | 223318 | 506169 | 2058788 | 2838494 | 0.441 | 0.725 | 0.608 (0.605-0.612) |
| Metro | 778819 | 1985535 | 8258722 | 11786492 | 0.392 | 0.701 | 0.56 (0.558-0.561) |
| Non metro | 178378 | 441602 | 1946755 | 2765371 | 0.404 | 0.704 | 0.574 (0.57-0.577) |

| **Supplementary Table 2:** **Average Annual percent change (AAPC) of CVD Burden in Malignant Cancer, related Reporting Odds Ratio in the United States, 1999 to 2020** | | | | | |
| --- | --- | --- | --- | --- | --- |
| **Reporting Odds Ratio AAPC (1999-2020)** | | | | | |
| **Age Group** | **AAPC (95% CI)** | **p-value** | **Age Group** | **AAPC (95% CI)** | **p-value** |
| **Overall** | | | | | |
| 15-24 | 0.43 (-0.19-1.07) | 0.145171 | 55-64 | 1.69* (1.52-1.83) | < 0.000001 |
| 25-34 | 1.19* (0.79-1.63) | < 0.000001 | 65-74 | 1.38* (1.27-1.49) | < 0.000001 |
| 35-44 | 1.34* (1.13-1.57) | < 0.000001 | 75-84 | 1.07* (0.94-1.17) | < 0.000001 |
| 45-54 | 1.47* (1.34-1.61) | < 0.000001 | 85+ | 0.66* (0.52-0.76) | < 0.000001 |
| **CVD Burden in Malignant Cancer Deaths (A/B)** | | | | | |
| 15-24 | 0.25 (-0.14-0.67) | 0.207958 | 55-64 | 0.96* (0.85-1.07) | < 0.000001 |
| 25-34 | 0.89* (0.47-1.22) | < 0.000001 | 65-74 | 0.67* (0.6-0.73) | < 0.000001 |
| 35-44 | 1.15* (0.98-1.32) | < 0.000001 | 75-84 | 0.32* (0.24-0.38) | < 0.000001 |
| 45-54 | 1.15* (1-1.3) | < 0.000001 | 85+ | -0.04 (-0.11-0.02) | 0.205959 |
| **CVD Burden in Non-Malignant Cancer Deaths (C/D)** | | | | | |
| 15-24 | -0.23 (-0.52-0.07) | 0.095981 | 55-64 | -0.67* (-0.72--0.63) | < 0.000001 |
| 25-34 | -0.25* (-0.48--0.04) | 0.018796 | 65-74 | -0.67* (-0.71--0.6) | < 0.000001 |
| 35-44 | -0.37* (-0.48--0.23) | < 0.000001 | 75-84 | -0.77* (-0.82--0.7) | < 0.000001 |
| 45-54 | -0.40* (-0.46--0.31) | < 0.000001 | 85+ | -0.70* (-0.74--0.64) | < 0.000001 |
| **Female** | | | | | |
| 15-24 | 0.2 (-0.41-0.81) | 0.515097 | 55-64 | 1.69* (1.5-1.85) | < 0.000001 |
| 25-34 | 1.16* (0.74-1.66) | < 0.000001 | 65-74 | 1.31* (1.13-1.44) | < 0.000001 |
| 35-44 | 1.14* (0.85-1.43) | < 0.000001 | 75-84 | 1.05* (0.87-1.18) | < 0.000001 |
| 45-54 | 1.55* (1.35-1.73) | < 0.000001 | 85+ | 0.57* (0.39-0.69) | < 0.000001 |
| **Male** | | | | | |
| 15-24 | 0.6 (-0.03-1.22) | 0.057988 | 55-64 | 1.61* (1.48-1.75) | < 0.000001 |
| 25-34 | 1.27* (0.93-1.64) | < 0.000001 | 65-74 | 1.37* (1.22-1.52) | < 0.000001 |
| 35-44 | 1.60* (1.36-1.87) | < 0.000001 | 75-84 | 1.07* (0.95-1.17) | < 0.000001 |
| 45-54 | 1.44* (1.24-1.64) | < 0.000001 | 85+ | 0.62* (0.5-0.72) | < 0.000001 |
| **NH American Indian or Alaskan Native** | | | | | |
| 15-24 | - | - | 55-64 | 2.06* (1.37-2.72) | < 0.000001 |
| 25-34 | - | - | 65-74 | 2.20* (1.75-2.69) | < 0.000001 |
| 35-44 | - | - | 75-84 | 2.06* (1.27-2.75) | < 0.000001 |
| 45-54 | 0.41 (-0.21-1.71) | 0.221556 | 85+ | 1.14* (0.38-2.23) | 0.008798 |
| **NH Asian or Pacific Islander** | | | | | |
| 15-24 | -2.76* (-4.26--0.92) | 0.003199 | 55-64 | 0.76* (0.06-1.23) | 0.040392 |
| 25-34 | -0.52 (-1.51-0.57) | 0.341532 | 65-74 | 0.4 (-0.12-0.7) | 0.084383 |
| 35-44 | -0.33 (-1.12-0.37) | 0.405119 | 75-84 | 0.38* (0.1-0.81) | 0.013197 |
| 45-54 | 0.02 (-0.31-0.37) | 0.962208 | 85+ | -0.31* (-0.49--0.14) | 0.0004 |
| **NH Black or African American** | | | | | |
| 15-24 | 1.12* (0.01-2.37) | 0.04799 | 55-64 | 1.20* (1.01-1.38) | < 0.000001 |
| 25-34 | 0.41 (-0.6-1.51) | 0.395121 | 65-74 | 1.12* (0.91-1.38) | < 0.000001 |
| 35-44 | 0.67* (0.23-1.06) | 0.004399 | 75-84 | 0.89* (0.68-1.12) | < 0.000001 |
| 45-54 | 1.03* (0.67-1.31) | < 0.000001 | 85+ | 0.67* (0.46-0.86) | < 0.000001 |
| **NH White** | | | | | |
| 15-24 | -0.27 (-1.01-0.41) | 0.369126 | 55-64 | 1.64* (1.5-1.78) | < 0.000001 |
| 25-34 | 1.53* (1.06-2.01) | < 0.000001 | 65-74 | 1.36* (1.23-1.5) | < 0.000001 |
| 35-44 | 1.77* (1.48-2.07) | < 0.000001 | 75-84 | 1.13* (0.98-1.23) | < 0.000001 |
| 45-54 | 1.66* (1.54-1.79) | < 0.000001 | 85+ | 0.69* (0.55-0.79) | < 0.000001 |
| **Hispanic or Latino** | | | | | |
| 15-24 | -0.63 (-1.37-0.2) | 0.139972 | 55-64 | 1.46* (1.17-1.72) | < 0.000001 |
| 25-34 | -0.52 (-1.41-0.36) | 0.264747 | 65-74 | 1.31* (0.97-1.6) | < 0.000001 |
| 35-44 | -0.25 (-0.87-0.32) | 0.418716 | 75-84 | 1.04* (0.81-1.23) | < 0.000001 |
| 45-54 | 0.42* (0.06-0.79) | 0.030794 | 85+ | 0.53* (0.31-0.72) | < 0.000001 |
| **Northeast region** | | | | | |
| 15-24 | -1.36* (-2.52--0.4) | 0.009198 | 55-64 | 0.64* (0.36-0.81) | < 0.000001 |
| 25-34 | 0.29 (-0.8-1.22) | 0.561488 | 65-74 | 0.68* (0.49-0.86) | < 0.000001 |
| 35-44 | 0.3 (-0.27-0.79) | 0.241952 | 75-84 | 0.69* (0.46-0.88) | < 0.000001 |
| 45-54 | 0.59* (0.2-0.96) | 0.025195 | 85+ | 0.34* (0.06-0.49) | 0.025195 |
| **Midwest region** | | | | | |
| 15-24 | -2.52* (-3.73--1.1) | < 0.000001 | 55-64 | 1.90* (1.7-2.13) | < 0.000001 |
| 25-34 | 2.07* (1.17-3.35) | < 0.000001 | 65-74 | 1.48* (1.37-1.6) | < 0.000001 |
| 35-44 | 2.59* (1.96-3.27) | < 0.000001 | 75-84 | 1.18* (0.97-1.42) | < 0.000001 |
| 45-54 | 2.20* (1.88-2.53) | < 0.000001 | 85+ | 0.68* (0.54-0.85) | < 0.000001 |
| **South region** | | | | | |
| 15-24 | 0.73* (0.13-1.4) | 0.021196 | 55-64 | 2.02* (1.87-2.18) | < 0.000001 |
| 25-34 | 1.16* (0.51-1.78) | 0.0024 | 65-74 | 1.72* (1.55-1.91) | < 0.000001 |
| 35-44 | 1.52* (1.19-1.88) | < 0.000001 | 75-84 | 1.38* (1.27-1.47) | < 0.000001 |
| 45-54 | 1.85* (1.67-2.06) | < 0.000001 | 85+ | 0.88* (0.73-0.99) | < 0.000001 |
| **West region** | | | | | |
| 15-24 | -0.24 (-1.61-0.59) | 0.512697 | 55-64 | 1.92* (1.62-2.13) | < 0.000001 |
| 25-34 | 0.96* (0.1-1.96) | 0.028794 | 65-74 | 1.46* (1.3-1.58) | < 0.000001 |
| 35-44 | 1.40* (0.88-1.92) | < 0.000001 | 75-84 | 1.15* (1.02-1.25) | < 0.000001 |
| 45-54 | 1.56* (1.33-1.82) | < 0.000001 | 85+ | 0.74* (0.58-0.85) | < 0.000001 |
| **Metropolitan area** | | | | | |
| 15-24 | 0.36 (-0.62-1.27) | 0.40152 | 55-64 | 1.64* (1.47-1.78) | < 0.000001 |
| 25-34 | 1.13* (0.6-1.64) | < 0.000001 | 65-74 | 1.32* (1.19-1.44) | < 0.000001 |
| 35-44 | 1.29* (1.03-1.55) | < 0.000001 | 75-84 | 1.04* (0.91-1.14) | < 0.000001 |
| 45-54 | 1.34* (1.16-1.52) | < 0.000001 | 85+ | 0.60* (0.43-0.73) | < 0.000001 |
| **Nonmetropolitan areas** | | | | | |
| 15-24 | 0.69 (-0.3-1.75) | 0.169166 | 55-64 | 1.94* (1.79-2.11) | < 0.000001 |
| 25-34 | 1.88* (0.82-2.9) | 0.0004 | 65-74 | 1.51* (1.34-1.67) | < 0.000001 |
| 35-44 | 1.67* (1.28-2.08) | < 0.000001 | 75-84 | 1.35* (1.21-1.49) | < 0.000001 |
| 45-54 | 2.02* (1.69-2.31) | < 0.000001 | 85+ | 0.91* (0.79-1.05) | < 0.000001 |
| AAPC = average annual percent change; N.H. = non-Hispanic; * Indicates that the average annual percentage change (AAPC) is significantly different from zero at α = 0.05. | | | | | |

| **Supplemental Table 3: CVD Burden in Malignant Neoplasm and Non-Malignant Neoplasm Deaths-Related Proportions across Age Groups Age Group in the Unites States, 1999-2020** | | | |
| --- | --- | --- | --- |
| **Year** | **CVD Burden in Malignant Cancer Deaths (A/B)** | **CVD Burden in Non-Malignant Cancer Deaths (C/D)** | **Reporting Odds Ratio (95% CI)** |
| **15-24 Age Group** | | | |
| **1999** | 0.186 | 0.101 | 1.842 (1.629-2.082) |
| **2000** | 0.181 | 0.097 | 1.874 (1.654-2.122) |
| **2001** | 0.180 | 0.097 | 1.863 (1.644-2.111) |
| **2002** | 0.177 | 0.096 | 1.856 (1.638-2.104) |
| **2003** | 0.164 | 0.098 | 1.673 (1.468-1.907) |
| **2004** | 0.188 | 0.097 | 1.947 (1.723-2.201) |
| **2005** | 0.182 | 0.098 | 1.848 (1.632-2.092) |
| **2006** | 0.172 | 0.096 | 1.796 (1.579-2.043) |
| **2007** | 0.191 | 0.097 | 1.967 (1.738-2.226) |
| **2008** | 0.169 | 0.101 | 1.681 (1.477-1.914) |
| **2009** | 0.179 | 0.108 | 1.66 (1.461-1.886) |
| **2010** | 0.182 | 0.108 | 1.685 (1.483-1.915) |
| **2011** | 0.180 | 0.103 | 1.745 (1.534-1.985) |
| **2012** | 0.168 | 0.101 | 1.656 (1.449-1.892) |
| **2013** | 0.173 | 0.105 | 1.642 (1.435-1.879) |
| **2014** | 0.181 | 0.103 | 1.746 (1.533-1.988) |
| **2015** | 0.190 | 0.099 | 1.917 (1.682-2.186) |
| **2016** | 0.179 | 0.094 | 1.9 (1.659-2.175) |
| **2017** | 0.203 | 0.092 | 2.205 (1.934-2.515) |
| **2018** | 0.181 | 0.099 | 1.837 (1.602-2.106) |
| **2019** | 0.197 | 0.099 | 1.99 (1.745-2.271) |
| **2020** | 0.185 | 0.095 | 1.952 (1.7-2.241) |
| **25-34 Age Group** | | | |
| **1999** | 0.162 | 0.200 | 0.806 (0.742-0.875) |
| **2000** | 0.162 | 0.188 | 0.864 (0.793-0.942) |
| **2001** | 0.161 | 0.186 | 0.865 (0.794-0.942) |
| **2002** | 0.143 | 0.195 | 0.736 (0.672-0.806) |
| **2003** | 0.163 | 0.198 | 0.822 (0.753-0.897) |
| **2004** | 0.161 | 0.200 | 0.805 (0.736-0.88) |
| **2005** | 0.158 | 0.197 | 0.806 (0.736-0.882) |
| **2006** | 0.160 | 0.197 | 0.814 (0.744-0.89) |
| **2007** | 0.171 | 0.193 | 0.886 (0.81-0.968) |
| **2008** | 0.163 | 0.199 | 0.817 (0.747-0.894) |
| **2009** | 0.154 | 0.202 | 0.763 (0.697-0.835) |
| **2010** | 0.158 | 0.204 | 0.771 (0.704-0.843) |
| **2011** | 0.163 | 0.200 | 0.811 (0.741-0.887) |
| **2012** | 0.167 | 0.198 | 0.844 (0.774-0.921) |
| **2013** | 0.156 | 0.199 | 0.786 (0.719-0.859) |
| **2014** | 0.165 | 0.199 | 0.83 (0.76-0.906) |
| **2015** | 0.172 | 0.189 | 0.91 (0.835-0.991) |
| **2016** | 0.158 | 0.176 | 0.897 (0.822-0.979) |
| **2017** | 0.172 | 0.178 | 0.966 (0.887-1.052) |
| **2018** | 0.188 | 0.182 | 1.03 (0.95-1.118) |
| **2019** | 0.180 | 0.183 | 0.989 (0.909-1.075) |
| **2020** | 0.188 | 0.182 | 1.033 (0.952-1.121) |
| **35-44 Age Group** | | | |
| **1999** | 0.154 | 0.378 | 0.408 (0.391-0.426) |
| **2000** | 0.157 | 0.354 | 0.443 (0.424-0.462) |
| **2001** | 0.150 | 0.346 | 0.434 (0.415-0.453) |
| **2002** | 0.147 | 0.357 | 0.412 (0.394-0.431) |
| **2003** | 0.153 | 0.362 | 0.423 (0.405-0.443) |
| **2004** | 0.151 | 0.374 | 0.404 (0.385-0.423) |
| **2005** | 0.157 | 0.370 | 0.423 (0.404-0.443) |
| **2006** | 0.157 | 0.371 | 0.423 (0.404-0.444) |
| **2007** | 0.157 | 0.371 | 0.423 (0.404-0.444) |
| **2008** | 0.158 | 0.373 | 0.425 (0.404-0.446) |
| **2009** | 0.157 | 0.379 | 0.415 (0.396-0.436) |
| **2010** | 0.156 | 0.383 | 0.407 (0.387-0.428) |
| **2011** | 0.161 | 0.381 | 0.421 (0.401-0.443) |
| **2012** | 0.153 | 0.382 | 0.4 (0.379-0.421) |
| **2013** | 0.165 | 0.384 | 0.429 (0.407-0.451) |
| **2014** | 0.171 | 0.384 | 0.445 (0.424-0.468) |
| **2015** | 0.162 | 0.369 | 0.439 (0.417-0.462) |
| **2016** | 0.175 | 0.356 | 0.491 (0.467-0.516) |
| **2017** | 0.180 | 0.349 | 0.517 (0.492-0.543) |
| **2018** | 0.182 | 0.353 | 0.516 (0.491-0.542) |
| **2019** | 0.190 | 0.348 | 0.546 (0.52-0.573) |
| **2020** | 0.194 | 0.346 | 0.56 (0.535-0.587) |
| **45-54 Age Group** | | | |
| **1999** | 0.175 | 0.574 | 0.304 (0.297-0.312) |
| **2000** | 0.169 | 0.556 | 0.303 (0.296-0.311) |
| **2001** | 0.172 | 0.543 | 0.316 (0.309-0.324) |
| **2002** | 0.168 | 0.544 | 0.309 (0.301-0.317) |
| **2003** | 0.170 | 0.539 | 0.316 (0.308-0.323) |
| **2004** | 0.172 | 0.539 | 0.319 (0.311-0.327) |
| **2005** | 0.169 | 0.531 | 0.318 (0.31-0.326) |
| **2006** | 0.171 | 0.531 | 0.323 (0.315-0.331) |
| **2007** | 0.171 | 0.530 | 0.323 (0.315-0.331) |
| **2008** | 0.174 | 0.525 | 0.331 (0.323-0.339) |
| **2009** | 0.177 | 0.526 | 0.336 (0.328-0.344) |
| **2010** | 0.173 | 0.530 | 0.326 (0.319-0.334) |
| **2011** | 0.177 | 0.526 | 0.336 (0.328-0.344) |
| **2012** | 0.176 | 0.525 | 0.335 (0.327-0.343) |
| **2013** | 0.183 | 0.533 | 0.343 (0.335-0.352) |
| **2014** | 0.182 | 0.530 | 0.344 (0.335-0.352) |
| **2015** | 0.188 | 0.527 | 0.357 (0.349-0.367) |
| **2016** | 0.194 | 0.526 | 0.369 (0.36-0.378) |
| **2017** | 0.202 | 0.522 | 0.386 (0.377-0.396) |
| **2018** | 0.203 | 0.531 | 0.383 (0.374-0.394) |
| **2019** | 0.207 | 0.531 | 0.39 (0.38-0.4) |
| **2020** | 0.219 | 0.521 | 0.421 (0.41-0.432) |
| **55-64 Age Group** | | | |
| **1999** | 0.212 | 0.716 | 0.296 (0.291-0.301) |
| **2000** | 0.209 | 0.707 | 0.296 (0.291-0.301) |
| **2001** | 0.213 | 0.695 | 0.306 (0.301-0.311) |
| **2002** | 0.207 | 0.693 | 0.298 (0.293-0.303) |
| **2003** | 0.205 | 0.683 | 0.3 (0.295-0.306) |
| **2004** | 0.208 | 0.676 | 0.308 (0.302-0.313) |
| **2005** | 0.209 | 0.669 | 0.313 (0.308-0.318) |
| **2006** | 0.210 | 0.666 | 0.316 (0.311-0.321) |
| **2007** | 0.213 | 0.657 | 0.324 (0.319-0.329) |
| **2008** | 0.213 | 0.649 | 0.328 (0.323-0.333) |
| **2009** | 0.210 | 0.643 | 0.327 (0.322-0.332) |
| **2010** | 0.213 | 0.642 | 0.331 (0.326-0.337) |
| **2011** | 0.213 | 0.638 | 0.333 (0.328-0.338) |
| **2012** | 0.213 | 0.634 | 0.335 (0.33-0.34) |
| **2013** | 0.217 | 0.631 | 0.344 (0.339-0.349) |
| **2014** | 0.216 | 0.630 | 0.343 (0.338-0.348) |
| **2015** | 0.215 | 0.631 | 0.341 (0.336-0.346) |
| **2016** | 0.222 | 0.628 | 0.354 (0.349-0.359) |
| **2017** | 0.230 | 0.630 | 0.365 (0.36-0.37) |
| **2018** | 0.235 | 0.633 | 0.371 (0.366-0.376) |
| **2019** | 0.241 | 0.632 | 0.381 (0.375-0.386) |
| **2020** | 0.258 | 0.616 | 0.419 (0.413-0.425) |
| **65-74 Age Group** | | | |
| **1999** | 0.266 | 0.753 | 0.353 (0.348-0.357) |
| **2000** | 0.264 | 0.748 | 0.352 (0.348-0.357) |
| **2001** | 0.266 | 0.740 | 0.359 (0.355-0.363) |
| **2002** | 0.265 | 0.735 | 0.36 (0.356-0.365) |
| **2003** | 0.265 | 0.729 | 0.363 (0.358-0.367) |
| **2004** | 0.264 | 0.724 | 0.364 (0.36-0.369) |
| **2005** | 0.261 | 0.714 | 0.366 (0.361-0.37) |
| **2006** | 0.265 | 0.709 | 0.374 (0.369-0.379) |
| **2007** | 0.264 | 0.702 | 0.376 (0.372-0.381) |
| **2008** | 0.263 | 0.693 | 0.379 (0.375-0.384) |
| **2009** | 0.260 | 0.693 | 0.375 (0.371-0.38) |
| **2010** | 0.262 | 0.686 | 0.381 (0.376-0.386) |
| **2011** | 0.259 | 0.681 | 0.38 (0.376-0.385) |
| **2012** | 0.260 | 0.680 | 0.383 (0.379-0.388) |
| **2013** | 0.261 | 0.677 | 0.385 (0.38-0.39) |
| **2014** | 0.259 | 0.674 | 0.384 (0.38-0.389) |
| **2015** | 0.260 | 0.674 | 0.386 (0.381-0.39) |
| **2016** | 0.267 | 0.675 | 0.395 (0.39-0.399) |
| **2017** | 0.275 | 0.677 | 0.406 (0.401-0.41) |
| **2018** | 0.280 | 0.676 | 0.413 (0.409-0.418) |
| **2019** | 0.288 | 0.680 | 0.424 (0.419-0.428) |
| **2020** | 0.308 | 0.651 | 0.473 (0.468-0.478) |
| **75-84 Age Group** | | | |
| **1999** | 0.332 | 0.763 | 0.435 (0.43-0.439) |
| **2000** | 0.331 | 0.758 | 0.437 (0.433-0.442) |
| **2001** | 0.326 | 0.750 | 0.435 (0.43-0.439) |
| **2002** | 0.331 | 0.742 | 0.446 (0.441-0.45) |
| **2003** | 0.326 | 0.736 | 0.443 (0.439-0.448) |
| **2004** | 0.324 | 0.729 | 0.445 (0.44-0.449) |
| **2005** | 0.326 | 0.718 | 0.453 (0.449-0.458) |
| **2006** | 0.323 | 0.711 | 0.454 (0.45-0.459) |
| **2007** | 0.324 | 0.706 | 0.459 (0.454-0.463) |
| **2008** | 0.320 | 0.695 | 0.46 (0.455-0.465) |
| **2009** | 0.318 | 0.694 | 0.458 (0.453-0.463) |
| **2010** | 0.320 | 0.685 | 0.466 (0.461-0.471) |
| **2011** | 0.317 | 0.679 | 0.467 (0.462-0.472) |
| **2012** | 0.313 | 0.674 | 0.465 (0.46-0.47) |
| **2013** | 0.313 | 0.673 | 0.465 (0.46-0.47) |
| **2014** | 0.309 | 0.671 | 0.46 (0.456-0.465) |
| **2015** | 0.310 | 0.670 | 0.462 (0.457-0.467) |
| **2016** | 0.315 | 0.670 | 0.471 (0.466-0.476) |
| **2017** | 0.319 | 0.669 | 0.477 (0.472-0.482) |
| **2018** | 0.326 | 0.671 | 0.486 (0.481-0.491) |
| **2019** | 0.334 | 0.672 | 0.497 (0.492-0.502) |
| **2020** | 0.357 | 0.644 | 0.553 (0.548-0.559) |
| **85+ Age Group** | | | |
| **1999** | 0.419 | 0.766 | 0.546 (0.54-0.553) |
| **2000** | 0.415 | 0.762 | 0.544 (0.538-0.551) |
| **2001** | 0.414 | 0.753 | 0.549 (0.542-0.556) |
| **2002** | 0.411 | 0.747 | 0.551 (0.544-0.558) |
| **2003** | 0.409 | 0.739 | 0.553 (0.546-0.56) |
| **2004** | 0.405 | 0.734 | 0.552 (0.545-0.559) |
| **2005** | 0.403 | 0.724 | 0.557 (0.551-0.564) |
| **2006** | 0.402 | 0.717 | 0.56 (0.553-0.567) |
| **2007** | 0.400 | 0.712 | 0.561 (0.555-0.568) |
| **2008** | 0.392 | 0.702 | 0.558 (0.552-0.565) |
| **2009** | 0.390 | 0.699 | 0.558 (0.552-0.565) |
| **2010** | 0.388 | 0.692 | 0.561 (0.554-0.567) |
| **2011** | 0.386 | 0.682 | 0.567 (0.56-0.573) |
| **2012** | 0.385 | 0.678 | 0.568 (0.561-0.574) |
| **2013** | 0.379 | 0.676 | 0.561 (0.555-0.568) |
| **2014** | 0.373 | 0.676 | 0.552 (0.546-0.559) |
| **2015** | 0.372 | 0.676 | 0.55 (0.544-0.557) |
| **2016** | 0.374 | 0.677 | 0.553 (0.546-0.559) |
| **2017** | 0.381 | 0.678 | 0.562 (0.556-0.569) |
| **2018** | 0.386 | 0.679 | 0.569 (0.563-0.576) |
| **2019** | 0.394 | 0.682 | 0.577 (0.571-0.584) |
| **2020** | 0.420 | 0.657 | 0.638 (0.631-0.645) |

| **Supplemental Table 4** CVD Burden in Malignant Neoplasm-Related Reporting Odds Ratio Stratified by Sex and Urbanization in the Unites States, 1999-2020 | | | | |
| --- | --- | --- | --- | --- |
| **Reporting Odds Ratio (95% CI)** | | | | |
| **Year** | **Female** | **Male** | **Metropolitan Area** | **Non-Metropolitan Area** |
| **15-24 Age Group** | | | | |
| **1999** | 1.22 (1.005-1.482) | 2.245 (1.917-2.629) | 1.895 (1.659-2.165) | 1.567 (1.139-2.156) |
| **2000** | 1.34 (1.104-1.626) | 2.154 (1.829-2.536) | 2.053 (1.798-2.346) | 1.054 (0.725-1.532) |
| **2001** | 1.303 (1.067-1.591) | 2.171 (1.849-2.549) | 1.938 (1.691-2.22) | 1.533 (1.111-2.115) |
| **2002** | 1.337 (1.099-1.625) | 2.131 (1.811-2.509) | 1.985 (1.736-2.271) | 1.267 (0.895-1.793) |
| **2003** | 1.302 (1.064-1.593) | 1.83 (1.54-2.175) | 1.737 (1.508-2.002) | 1.357 (0.958-1.924) |
| **2004** | 1.417 (1.165-1.723) | 2.241 (1.915-2.621) | 2.036 (1.785-2.322) | 1.482 (1.057-2.077) |
| **2005** | 1.328 (1.087-1.622) | 2.128 (1.816-2.493) | 1.98 (1.731-2.263) | 1.287 (0.923-1.794) |
| **2006** | 1.221 (0.99-1.506) | 2.123 (1.802-2.5) | 1.962 (1.711-2.25) | 1.005 (0.676-1.495) |
| **2007** | 1.448 (1.192-1.759) | 2.218 (1.889-2.605) | 2.055 (1.802-2.345) | 1.448 (1.007-2.084) |
| **2008** | 1.152 (0.928-1.43) | 1.985 (1.688-2.335) | 1.725 (1.501-1.983) | 1.449 (1.015-2.069) |
| **2009** | 1.212 (0.987-1.489) | 1.907 (1.621-2.244) | 1.624 (1.413-1.868) | 1.842 (1.345-2.524) |
| **2010** | 1.253 (1.014-1.548) | 1.917 (1.633-2.252) | 1.698 (1.478-1.95) | 1.614 (1.157-2.25) |
| **2011** | 1.291 (1.05-1.588) | 1.987 (1.685-2.342) | 1.789 (1.56-2.053) | 1.449 (0.994-2.112) |
| **2012** | 1.186 (0.96-1.465) | 1.925 (1.62-2.287) | 1.766 (1.534-2.033) | 0.976 (0.63-1.512) |
| **2013** | 1.243 (1.007-1.534) | 1.855 (1.556-2.212) | 1.669 (1.444-1.929) | 1.49 (1.026-2.164) |
| **2014** | 1.356 (1.107-1.661) | 1.918 (1.619-2.273) | 1.79 (1.558-2.057) | 1.459 (1.006-2.117) |
| **2015** | 1.333 (1.076-1.651) | 2.277 (1.929-2.686) | 2.005 (1.742-2.307) | 1.482 (1.031-2.13) |
| **2016** | 1.265 (1.002-1.597) | 2.291 (1.94-2.706) | 1.987 (1.718-2.297) | 1.473 (1.01-2.149) |
| **2017** | 1.604 (1.297-1.984) | 2.546 (2.154-3.008) | 2.368 (2.062-2.719) | 1.295 (0.838-2.001) |
| **2018** | 1.381 (1.108-1.722) | 2.081 (1.748-2.478) | 1.864 (1.609-2.159) | 1.682 (1.156-2.449) |
| **2019** | 1.342 (1.088-1.655) | 2.406 (2.031-2.851) | 2.035 (1.764-2.347) | 1.801 (1.277-2.538) |
| **2020** | 1.212 (0.971-1.512) | 2.467 (2.067-2.944) | 2.037 (1.759-2.359) | 1.489 (0.99-2.238) |
| **25-34 Age Group** | | | | |
| **1999** | 0.572 (0.505-0.647) | 0.98 (0.876-1.097) | 0.823 (0.752-0.899) | 0.707 (0.565-0.885) |
| **2000** | 0.65 (0.575-0.735) | 1.005 (0.89-1.135) | 0.908 (0.828-0.995) | 0.615 (0.477-0.793) |
| **2001** | 0.635 (0.563-0.716) | 1.021 (0.904-1.154) | 0.896 (0.817-0.983) | 0.718 (0.575-0.897) |
| **2002** | 0.519 (0.453-0.594) | 0.91 (0.804-1.03) | 0.74 (0.67-0.817) | 0.718 (0.573-0.899) |
| **2003** | 0.628 (0.555-0.712) | 0.939 (0.83-1.063) | 0.862 (0.786-0.947) | 0.597 (0.462-0.772) |
| **2004** | 0.612 (0.539-0.696) | 0.931 (0.821-1.056) | 0.828 (0.752-0.912) | 0.689 (0.543-0.874) |
| **2005** | 0.596 (0.522-0.68) | 0.953 (0.841-1.078) | 0.838 (0.76-0.923) | 0.643 (0.504-0.82) |
| **2006** | 0.632 (0.556-0.718) | 0.923 (0.814-1.047) | 0.847 (0.77-0.932) | 0.634 (0.493-0.816) |
| **2007** | 0.712 (0.627-0.807) | 0.967 (0.851-1.098) | 0.911 (0.827-1.004) | 0.763 (0.606-0.961) |
| **2008** | 0.645 (0.566-0.735) | 0.914 (0.806-1.036) | 0.838 (0.76-0.923) | 0.718 (0.567-0.91) |
| **2009** | 0.654 (0.576-0.744) | 0.808 (0.711-0.919) | 0.8 (0.726-0.881) | 0.569 (0.441-0.736) |
| **2010** | 0.609 (0.534-0.694) | 0.878 (0.775-0.994) | 0.798 (0.724-0.879) | 0.63 (0.494-0.803) |
| **2011** | 0.671 (0.59-0.763) | 0.889 (0.784-1.009) | 0.832 (0.755-0.917) | 0.702 (0.552-0.894) |
| **2012** | 0.668 (0.588-0.759) | 0.966 (0.856-1.09) | 0.853 (0.776-0.938) | 0.804 (0.641-1.008) |
| **2013** | 0.649 (0.57-0.738) | 0.864 (0.764-0.977) | 0.791 (0.717-0.871) | 0.769 (0.615-0.961) |
| **2014** | 0.656 (0.577-0.745) | 0.951 (0.843-1.073) | 0.85 (0.773-0.935) | 0.736 (0.584-0.928) |
| **2015** | 0.705 (0.622-0.798) | 1.05 (0.933-1.182) | 0.93 (0.848-1.02) | 0.808 (0.642-1.018) |
| **2016** | 0.708 (0.625-0.801) | 1.015 (0.897-1.148) | 0.954 (0.869-1.047) | 0.626 (0.488-0.803) |
| **2017** | 0.787 (0.699-0.887) | 1.05 (0.927-1.189) | 0.985 (0.898-1.08) | 0.869 (0.69-1.094) |
| **2018** | 0.781 (0.696-0.877) | 1.202 (1.07-1.351) | 1.069 (0.979-1.166) | 0.827 (0.655-1.043) |
| **2019** | 0.7 (0.618-0.792) | 1.225 (1.092-1.374) | 1.023 (0.936-1.12) | 0.809 (0.638-1.026) |
| **2020** | 0.746 (0.662-0.839) | 1.258 (1.123-1.409) | 1.036 (0.948-1.132) | 1.029 (0.833-1.271) |
| **35-44 Age Group** | | | | |
| **1999** | 0.364 (0.343-0.387) | 0.441 (0.415-0.469) | 0.419 (0.401-0.439) | 0.352 (0.315-0.394) |
| **2000** | 0.405 (0.381-0.43) | 0.461 (0.433-0.491) | 0.456 (0.435-0.477) | 0.382 (0.342-0.426) |
| **2001** | 0.395 (0.371-0.419) | 0.458 (0.43-0.489) | 0.451 (0.43-0.472) | 0.355 (0.316-0.397) |
| **2002** | 0.376 (0.354-0.4) | 0.438 (0.41-0.468) | 0.426 (0.406-0.447) | 0.349 (0.312-0.391) |
| **2003** | 0.389 (0.366-0.414) | 0.45 (0.422-0.48) | 0.441 (0.42-0.463) | 0.341 (0.304-0.383) |
| **2004** | 0.378 (0.355-0.403) | 0.424 (0.396-0.453) | 0.415 (0.395-0.436) | 0.349 (0.31-0.393) |
| **2005** | 0.402 (0.378-0.429) | 0.437 (0.408-0.467) | 0.43 (0.409-0.452) | 0.39 (0.348-0.438) |
| **2006** | 0.402 (0.377-0.429) | 0.438 (0.408-0.469) | 0.434 (0.412-0.457) | 0.375 (0.333-0.421) |
| **2007** | 0.406 (0.38-0.433) | 0.434 (0.405-0.466) | 0.437 (0.416-0.461) | 0.353 (0.312-0.401) |
| **2008** | 0.397 (0.371-0.425) | 0.448 (0.417-0.481) | 0.429 (0.407-0.452) | 0.404 (0.357-0.456) |
| **2009** | 0.389 (0.364-0.417) | 0.44 (0.409-0.473) | 0.426 (0.404-0.449) | 0.359 (0.315-0.409) |
| **2010** | 0.387 (0.361-0.415) | 0.424 (0.393-0.457) | 0.416 (0.394-0.44) | 0.357 (0.312-0.407) |
| **2011** | 0.404 (0.377-0.432) | 0.438 (0.407-0.472) | 0.431 (0.409-0.456) | 0.37 (0.324-0.421) |
| **2012** | 0.371 (0.346-0.399) | 0.427 (0.395-0.461) | 0.407 (0.385-0.431) | 0.362 (0.316-0.414) |
| **2013** | 0.405 (0.378-0.434) | 0.452 (0.419-0.486) | 0.436 (0.413-0.461) | 0.388 (0.341-0.443) |
| **2014** | 0.416 (0.388-0.445) | 0.477 (0.443-0.513) | 0.454 (0.43-0.479) | 0.403 (0.354-0.459) |
| **2015** | 0.406 (0.378-0.436) | 0.468 (0.433-0.504) | 0.446 (0.422-0.471) | 0.406 (0.356-0.464) |
| **2016** | 0.447 (0.418-0.479) | 0.527 (0.49-0.568) | 0.504 (0.478-0.532) | 0.429 (0.376-0.489) |
| **2017** | 0.46 (0.429-0.492) | 0.571 (0.531-0.613) | 0.53 (0.502-0.559) | 0.46 (0.405-0.522) |
| **2018** | 0.474 (0.443-0.507) | 0.544 (0.505-0.585) | 0.523 (0.496-0.552) | 0.482 (0.426-0.546) |
| **2019** | 0.464 (0.434-0.496) | 0.627 (0.585-0.673) | 0.561 (0.533-0.591) | 0.469 (0.412-0.533) |
| **2020** | 0.498 (0.466-0.531) | 0.61 (0.569-0.654) | 0.569 (0.541-0.599) | 0.519 (0.459-0.587) |
| **45-54 Age Group** | | | | |
| **1999** | 0.295 (0.284-0.306) | 0.313 (0.302-0.324) | 0.309 (0.301-0.318) | 0.28 (0.263-0.298) |
| **2000** | 0.29 (0.279-0.301) | 0.315 (0.304-0.326) | 0.309 (0.301-0.318) | 0.276 (0.259-0.294) |
| **2001** | 0.302 (0.291-0.314) | 0.329 (0.318-0.34) | 0.326 (0.317-0.335) | 0.274 (0.258-0.291) |
| **2002** | 0.301 (0.29-0.312) | 0.317 (0.306-0.327) | 0.314 (0.306-0.323) | 0.285 (0.268-0.302) |
| **2003** | 0.31 (0.299-0.322) | 0.322 (0.311-0.333) | 0.32 (0.311-0.329) | 0.295 (0.278-0.313) |
| **2004** | 0.312 (0.3-0.323) | 0.327 (0.316-0.338) | 0.324 (0.315-0.332) | 0.297 (0.28-0.315) |
| **2005** | 0.303 (0.293-0.315) | 0.333 (0.322-0.344) | 0.32 (0.312-0.329) | 0.305 (0.288-0.324) |
| **2006** | 0.314 (0.303-0.325) | 0.333 (0.322-0.344) | 0.326 (0.317-0.334) | 0.309 (0.292-0.328) |
| **2007** | 0.318 (0.307-0.33) | 0.33 (0.319-0.341) | 0.329 (0.321-0.338) | 0.294 (0.277-0.312) |
| **2008** | 0.328 (0.316-0.34) | 0.337 (0.326-0.348) | 0.335 (0.326-0.344) | 0.312 (0.294-0.33) |
| **2009** | 0.338 (0.326-0.35) | 0.338 (0.327-0.349) | 0.34 (0.331-0.349) | 0.318 (0.3-0.337) |
| **2010** | 0.329 (0.317-0.341) | 0.327 (0.317-0.338) | 0.331 (0.322-0.34) | 0.306 (0.288-0.324) |
| **2011** | 0.34 (0.328-0.352) | 0.338 (0.327-0.35) | 0.34 (0.331-0.349) | 0.319 (0.302-0.338) |
| **2012** | 0.335 (0.323-0.348) | 0.339 (0.328-0.351) | 0.336 (0.327-0.345) | 0.33 (0.311-0.349) |
| **2013** | 0.345 (0.333-0.358) | 0.345 (0.334-0.357) | 0.348 (0.339-0.358) | 0.319 (0.301-0.338) |
| **2014** | 0.346 (0.333-0.359) | 0.346 (0.335-0.358) | 0.35 (0.34-0.359) | 0.316 (0.297-0.335) |
| **2015** | 0.355 (0.342-0.368) | 0.364 (0.352-0.377) | 0.364 (0.355-0.375) | 0.326 (0.307-0.347) |
| **2016** | 0.36 (0.347-0.373) | 0.384 (0.371-0.397) | 0.371 (0.361-0.381) | 0.36 (0.339-0.382) |
| **2017** | 0.377 (0.364-0.391) | 0.399 (0.385-0.413) | 0.391 (0.38-0.402) | 0.365 (0.344-0.389) |
| **2018** | 0.381 (0.367-0.395) | 0.391 (0.377-0.405) | 0.383 (0.373-0.395) | 0.384 (0.361-0.409) |
| **2019** | 0.377 (0.362-0.391) | 0.408 (0.393-0.423) | 0.39 (0.379-0.402) | 0.389 (0.365-0.414) |
| **2020** | 0.413 (0.398-0.428) | 0.432 (0.417-0.448) | 0.418 (0.407-0.43) | 0.432 (0.406-0.458) |
| **55-64 Age Group** | | | | |
| **1999** | 0.29 (0.282-0.297) | 0.302 (0.296-0.309) | 0.299 (0.294-0.305) | 0.281 (0.27-0.293) |
| **2000** | 0.286 (0.279-0.294) | 0.305 (0.298-0.312) | 0.3 (0.295-0.306) | 0.277 (0.266-0.288) |
| **2001** | 0.299 (0.291-0.307) | 0.313 (0.307-0.321) | 0.309 (0.304-0.315) | 0.291 (0.279-0.303) |
| **2002** | 0.292 (0.285-0.3) | 0.304 (0.297-0.311) | 0.298 (0.293-0.304) | 0.296 (0.285-0.308) |
| **2003** | 0.291 (0.283-0.298) | 0.31 (0.304-0.317) | 0.302 (0.296-0.307) | 0.295 (0.284-0.307) |
| **2004** | 0.301 (0.293-0.309) | 0.315 (0.308-0.322) | 0.31 (0.304-0.316) | 0.297 (0.285-0.308) |
| **2005** | 0.307 (0.299-0.315) | 0.321 (0.314-0.328) | 0.314 (0.309-0.32) | 0.308 (0.296-0.32) |
| **2006** | 0.309 (0.301-0.317) | 0.324 (0.317-0.331) | 0.316 (0.31-0.322) | 0.315 (0.304-0.327) |
| **2007** | 0.316 (0.308-0.324) | 0.333 (0.326-0.34) | 0.326 (0.32-0.331) | 0.318 (0.307-0.33) |
| **2008** | 0.32 (0.313-0.329) | 0.336 (0.329-0.343) | 0.329 (0.323-0.335) | 0.322 (0.31-0.334) |
| **2009** | 0.315 (0.308-0.323) | 0.338 (0.331-0.345) | 0.327 (0.321-0.333) | 0.327 (0.316-0.339) |
| **2010** | 0.324 (0.316-0.332) | 0.34 (0.333-0.346) | 0.334 (0.328-0.34) | 0.32 (0.309-0.332) |
| **2011** | 0.326 (0.319-0.334) | 0.341 (0.334-0.348) | 0.336 (0.33-0.342) | 0.321 (0.31-0.333) |
| **2012** | 0.327 (0.319-0.335) | 0.344 (0.337-0.351) | 0.338 (0.332-0.343) | 0.325 (0.313-0.336) |
| **2013** | 0.338 (0.33-0.346) | 0.351 (0.345-0.358) | 0.346 (0.341-0.352) | 0.334 (0.322-0.346) |
| **2014** | 0.337 (0.329-0.345) | 0.351 (0.344-0.358) | 0.345 (0.34-0.351) | 0.333 (0.322-0.345) |
| **2015** | 0.333 (0.325-0.341) | 0.35 (0.343-0.357) | 0.342 (0.336-0.347) | 0.339 (0.328-0.351) |
| **2016** | 0.344 (0.337-0.352) | 0.365 (0.358-0.372) | 0.355 (0.349-0.361) | 0.35 (0.338-0.362) |
| **2017** | 0.356 (0.348-0.364) | 0.375 (0.368-0.382) | 0.365 (0.36-0.371) | 0.363 (0.351-0.375) |
| **2018** | 0.357 (0.349-0.365) | 0.386 (0.378-0.393) | 0.371 (0.365-0.377) | 0.372 (0.36-0.385) |
| **2019** | 0.369 (0.361-0.378) | 0.394 (0.386-0.401) | 0.38 (0.374-0.386) | 0.385 (0.373-0.398) |
| **2020** | 0.411 (0.402-0.419) | 0.43 (0.422-0.438) | 0.419 (0.413-0.425) | 0.419 (0.406-0.432) |
| **65-74 Age Group** | | | | |
| **1999** | 0.336 (0.33-0.342) | 0.365 (0.36-0.371) | 0.353 (0.348-0.358) | 0.351 (0.341-0.361) |
| **2000** | 0.336 (0.33-0.343) | 0.365 (0.359-0.37) | 0.354 (0.349-0.358) | 0.346 (0.337-0.356) |
| **2001** | 0.347 (0.34-0.353) | 0.368 (0.362-0.374) | 0.359 (0.354-0.364) | 0.357 (0.347-0.367) |
| **2002** | 0.35 (0.343-0.356) | 0.368 (0.362-0.374) | 0.361 (0.356-0.366) | 0.356 (0.347-0.366) |
| **2003** | 0.351 (0.344-0.357) | 0.372 (0.366-0.378) | 0.362 (0.357-0.367) | 0.365 (0.355-0.375) |
| **2004** | 0.352 (0.345-0.359) | 0.375 (0.368-0.381) | 0.365 (0.36-0.37) | 0.362 (0.352-0.372) |
| **2005** | 0.35 (0.343-0.357) | 0.378 (0.371-0.384) | 0.365 (0.36-0.37) | 0.368 (0.358-0.379) |
| **2006** | 0.363 (0.356-0.37) | 0.383 (0.376-0.389) | 0.373 (0.367-0.378) | 0.379 (0.368-0.39) |
| **2007** | 0.363 (0.356-0.37) | 0.387 (0.381-0.394) | 0.377 (0.372-0.383) | 0.373 (0.362-0.383) |
| **2008** | 0.366 (0.359-0.373) | 0.39 (0.384-0.397) | 0.379 (0.373-0.384) | 0.382 (0.371-0.392) |
| **2009** | 0.361 (0.354-0.368) | 0.387 (0.381-0.394) | 0.375 (0.369-0.38) | 0.378 (0.368-0.389) |
| **2010** | 0.37 (0.363-0.377) | 0.391 (0.384-0.397) | 0.382 (0.377-0.387) | 0.378 (0.368-0.389) |
| **2011** | 0.368 (0.361-0.375) | 0.39 (0.384-0.397) | 0.381 (0.376-0.387) | 0.376 (0.366-0.387) |
| **2012** | 0.369 (0.362-0.376) | 0.395 (0.389-0.402) | 0.384 (0.379-0.389) | 0.38 (0.37-0.391) |
| **2013** | 0.372 (0.365-0.379) | 0.396 (0.39-0.402) | 0.385 (0.38-0.391) | 0.383 (0.373-0.393) |
| **2014** | 0.37 (0.363-0.376) | 0.396 (0.39-0.403) | 0.383 (0.378-0.388) | 0.39 (0.38-0.401) |
| **2015** | 0.372 (0.365-0.379) | 0.397 (0.391-0.403) | 0.384 (0.379-0.389) | 0.391 (0.381-0.401) |
| **2016** | 0.379 (0.372-0.386) | 0.408 (0.402-0.414) | 0.392 (0.387-0.397) | 0.407 (0.397-0.418) |
| **2017** | 0.388 (0.381-0.395) | 0.42 (0.414-0.426) | 0.405 (0.4-0.41) | 0.41 (0.4-0.421) |
| **2018** | 0.397 (0.39-0.403) | 0.427 (0.421-0.434) | 0.411 (0.406-0.416) | 0.424 (0.413-0.434) |
| **2019** | 0.401 (0.395-0.408) | 0.441 (0.435-0.448) | 0.42 (0.415-0.425) | 0.439 (0.428-0.449) |
| **2020** | 0.451 (0.444-0.458) | 0.491 (0.484-0.497) | 0.47 (0.464-0.475) | 0.486 (0.474-0.497) |
| **75-84 Age Group** | | | | |
| **1999** | 0.413 (0.407-0.419) | 0.453 (0.447-0.459) | 0.436 (0.432-0.441) | 0.427 (0.417-0.437) |
| **2000** | 0.416 (0.41-0.422) | 0.456 (0.449-0.462) | 0.437 (0.432-0.442) | 0.439 (0.429-0.449) |
| **2001** | 0.415 (0.409-0.421) | 0.451 (0.445-0.457) | 0.435 (0.43-0.44) | 0.432 (0.422-0.442) |
| **2002** | 0.427 (0.421-0.433) | 0.461 (0.455-0.468) | 0.444 (0.439-0.449) | 0.452 (0.442-0.463) |
| **2003** | 0.422 (0.415-0.428) | 0.461 (0.455-0.467) | 0.442 (0.437-0.447) | 0.447 (0.437-0.458) |
| **2004** | 0.422 (0.416-0.428) | 0.463 (0.457-0.47) | 0.442 (0.437-0.447) | 0.456 (0.446-0.467) |
| **2005** | 0.438 (0.431-0.444) | 0.466 (0.459-0.472) | 0.452 (0.447-0.458) | 0.457 (0.447-0.468) |
| **2006** | 0.435 (0.429-0.442) | 0.47 (0.463-0.476) | 0.452 (0.447-0.457) | 0.464 (0.454-0.475) |
| **2007** | 0.436 (0.429-0.443) | 0.477 (0.47-0.483) | 0.457 (0.451-0.462) | 0.467 (0.456-0.478) |
| **2008** | 0.441 (0.435-0.448) | 0.474 (0.468-0.481) | 0.458 (0.453-0.464) | 0.467 (0.457-0.479) |
| **2009** | 0.44 (0.433-0.447) | 0.472 (0.465-0.479) | 0.457 (0.452-0.463) | 0.462 (0.451-0.474) |
| **2010** | 0.446 (0.439-0.453) | 0.482 (0.475-0.489) | 0.466 (0.461-0.472) | 0.467 (0.456-0.479) |
| **2011** | 0.45 (0.443-0.457) | 0.479 (0.472-0.485) | 0.467 (0.462-0.473) | 0.465 (0.454-0.476) |
| **2012** | 0.448 (0.441-0.455) | 0.477 (0.47-0.484) | 0.464 (0.459-0.47) | 0.469 (0.458-0.481) |
| **2013** | 0.446 (0.439-0.454) | 0.479 (0.472-0.486) | 0.467 (0.462-0.473) | 0.458 (0.446-0.469) |
| **2014** | 0.438 (0.431-0.445) | 0.477 (0.47-0.484) | 0.459 (0.453-0.464) | 0.467 (0.456-0.479) |
| **2015** | 0.441 (0.434-0.448) | 0.478 (0.471-0.485) | 0.462 (0.457-0.468) | 0.463 (0.452-0.474) |
| **2016** | 0.45 (0.443-0.458) | 0.486 (0.479-0.493) | 0.468 (0.463-0.474) | 0.481 (0.47-0.493) |
| **2017** | 0.455 (0.447-0.462) | 0.494 (0.487-0.501) | 0.475 (0.47-0.481) | 0.487 (0.475-0.498) |
| **2018** | 0.465 (0.458-0.473) | 0.502 (0.495-0.509) | 0.482 (0.476-0.487) | 0.506 (0.495-0.518) |
| **2019** | 0.473 (0.465-0.48) | 0.515 (0.508-0.522) | 0.492 (0.486-0.498) | 0.52 (0.508-0.532) |
| **2020** | 0.525 (0.518-0.533) | 0.574 (0.567-0.582) | 0.548 (0.542-0.554) | 0.574 (0.562-0.587) |
| **85+ Age Group** | | | | |
| **1999** | 0.534 (0.525-0.543) | 0.565 (0.555-0.576) | 0.548 (0.54-0.556) | 0.54 (0.525-0.555) |
| **2000** | 0.533 (0.524-0.542) | 0.561 (0.551-0.572) | 0.545 (0.537-0.552) | 0.543 (0.528-0.558) |
| **2001** | 0.539 (0.53-0.547) | 0.565 (0.555-0.576) | 0.547 (0.539-0.554) | 0.559 (0.543-0.574) |
| **2002** | 0.537 (0.528-0.545) | 0.569 (0.559-0.58) | 0.551 (0.543-0.559) | 0.55 (0.535-0.565) |
| **2003** | 0.538 (0.529-0.547) | 0.572 (0.562-0.583) | 0.551 (0.543-0.559) | 0.562 (0.546-0.577) |
| **2004** | 0.539 (0.53-0.548) | 0.567 (0.556-0.578) | 0.547 (0.54-0.555) | 0.57 (0.555-0.586) |
| **2005** | 0.545 (0.536-0.554) | 0.57 (0.56-0.581) | 0.555 (0.548-0.563) | 0.566 (0.55-0.581) |
| **2006** | 0.546 (0.537-0.555) | 0.575 (0.564-0.585) | 0.558 (0.55-0.565) | 0.57 (0.554-0.585) |
| **2007** | 0.55 (0.541-0.559) | 0.572 (0.562-0.583) | 0.56 (0.553-0.568) | 0.566 (0.55-0.581) |
| **2008** | 0.544 (0.535-0.553) | 0.572 (0.562-0.582) | 0.555 (0.547-0.562) | 0.575 (0.56-0.591) |
| **2009** | 0.541 (0.532-0.55) | 0.575 (0.565-0.585) | 0.555 (0.548-0.562) | 0.575 (0.559-0.591) |
| **2010** | 0.547 (0.539-0.556) | 0.572 (0.562-0.582) | 0.559 (0.552-0.567) | 0.567 (0.552-0.582) |
| **2011** | 0.551 (0.542-0.56) | 0.58 (0.57-0.59) | 0.565 (0.558-0.572) | 0.574 (0.558-0.59) |
| **2012** | 0.55 (0.542-0.559) | 0.582 (0.572-0.592) | 0.568 (0.56-0.575) | 0.568 (0.553-0.584) |
| **2013** | 0.548 (0.539-0.557) | 0.571 (0.561-0.58) | 0.561 (0.554-0.568) | 0.566 (0.55-0.581) |
| **2014** | 0.534 (0.525-0.543) | 0.566 (0.557-0.576) | 0.55 (0.543-0.557) | 0.561 (0.546-0.577) |
| **2015** | 0.53 (0.522-0.539) | 0.567 (0.558-0.576) | 0.546 (0.539-0.553) | 0.57 (0.555-0.586) |
| **2016** | 0.534 (0.526-0.543) | 0.566 (0.557-0.576) | 0.548 (0.541-0.555) | 0.576 (0.561-0.592) |
| **2017** | 0.546 (0.537-0.554) | 0.574 (0.564-0.583) | 0.558 (0.551-0.565) | 0.583 (0.568-0.599) |
| **2018** | 0.549 (0.54-0.558) | 0.584 (0.575-0.593) | 0.563 (0.556-0.57) | 0.6 (0.584-0.616) |
| **2019** | 0.556 (0.547-0.564) | 0.593 (0.584-0.602) | 0.57 (0.563-0.577) | 0.615 (0.599-0.631) |
| **2020** | 0.616 (0.607-0.626) | 0.654 (0.644-0.663) | 0.634 (0.627-0.641) | 0.659 (0.643-0.676) |

| **Supplemental Table 5** CVD Burden in Malignant Neoplasm-Related Reporting Odds Ratio Stratified by Census Regions in the Unites States, 1999-2020 | | | | | |
| --- | --- | --- | --- | --- | --- |
| **Reporting Odds Ratio (95% CI)** | | | | | |
| **Year** | **Northeast** | **Midwest** | **South** | **West** | |
| **15-24 Age Group** | | | | | |
| **1999** | 2.641 (2.039-3.421) | 2.422 (1.789-3.279) | 1.25 (0.993-1.573) | 2.584 (2.057-3.246) | |
| **2000** | 2.928 (2.271-3.775) | 0.983 (0.695-1.39) | 1.537 (1.235-1.912) | 2.498 (1.963-3.18) | |
| **2001** | 2.629 (2.014-3.432) | 1.575 (1.206-2.059) | 1.352 (1.07-1.708) | 2.515 (1.965-3.22) | |
| **2002** | 2.426 (1.864-3.158) | 1.341 (0.977-1.84) | 1.623 (1.31-2.012) | 2.184 (1.713-2.786) | |
| **2003** | 2.354 (1.782-3.109) | 0.89 (0.618-1.281) | 1.541 (1.234-1.924) | 2.112 (1.649-2.704) | |
| **2004** | 2.835 (2.21-3.638) | 1.104 (0.798-1.528) | 1.803 (1.466-2.218) | 2.291 (1.79-2.933) | |
| **2005** | 2.359 (1.82-3.057) | 0.978 (0.682-1.402) | 1.653 (1.333-2.049) | 2.443 (1.945-3.068) | |
| **2006** | 1.775 (1.315-2.395) | 1.284 (0.926-1.78) | 1.681 (1.347-2.099) | 2.428 (1.925-3.062) | |
| **2007** | 2.788 (2.154-3.608) | 1.393 (1.021-1.902) | 1.547 (1.23-1.946) | 2.372 (1.89-2.977) | |
| **2008** | 2.101 (1.595-2.768) | 1.061 (0.735-1.533) | 1.487 (1.192-1.856) | 2.02 (1.59-2.565) | |
| **2009** | 2.077 (1.576-2.739) | 1.218 (0.887-1.672) | 1.58 (1.276-1.957) | 1.84 (1.431-2.365) | |
| **2010** | 1.96 (1.471-2.611) | 1.378 (1.005-1.89) | 1.577 (1.273-1.954) | 1.861 (1.458-2.376) | |
| **2011** | 1.691 (1.242-2.301) | 1.231 (0.884-1.715) | 1.655 (1.333-2.055) | 2.31 (1.832-2.914) | |
| **2012** | 1.935 (1.41-2.655) | 1.461 (1.051-2.031) | 1.362 (1.08-1.719) | 1.98 (1.561-2.51) | |
| **2013** | 1.87 (1.366-2.559) | 1.175 (0.827-1.669) | 1.594 (1.275-1.993) | 1.889 (1.474-2.422) | |
| **2014** | 1.916 (1.416-2.592) | 1.402 (1.001-1.964) | 1.752 (1.423-2.157) | 1.826 (1.422-2.346) | |
| **2015** | 2.248 (1.662-3.041) | 1.311 (0.93-1.846) | 1.598 (1.269-2.012) | 2.578 (2.048-3.246) | |
| **2016** | 1.691 (1.189-2.406) | 1.158 (0.784-1.712) | 1.784 (1.437-2.214) | 2.753 (2.168-3.497) | |
| **2017** | 2.773 (2.023-3.802) | 1.284 (0.873-1.889) | 1.805 (1.455-2.239) | 3.252 (2.575-4.106) | |
| **2018** | 2.013 (1.466-2.763) | 1.142 (0.785-1.66) | 1.691 (1.347-2.123) | 2.463 (1.921-3.156) | |
| **2019** | 2.187 (1.619-2.955) | 1.408 (0.997-1.987) | 1.759 (1.41-2.195) | 2.644 (2.073-3.373) | |
| **2020** | 2.107 (1.542-2.878) | 1.351 (0.918-1.989) | 1.74 (1.388-2.181) | 2.521 (1.951-3.259) | |
| **25-34 Age Group** | | | | | |
| **1999** | 1.145 (0.976-1.342) | 0.509 (0.409-0.633) | 0.688 (0.596-0.795) | 0.958 (0.805-1.139) | |
| **2000** | 1.382 (1.172-1.629) | 0.561 (0.454-0.694) | 0.644 (0.55-0.754) | 1.117 (0.936-1.333) | |
| **2001** | 1.369 (1.153-1.626) | 0.46 (0.365-0.58) | 0.748 (0.648-0.863) | 1.145 (0.963-1.362) | |
| **2002** | 0.961 (0.791-1.167) | 0.499 (0.398-0.624) | 0.679 (0.584-0.789) | 0.911 (0.757-1.096) | |
| **2003** | 1.484 (1.256-1.753) | 0.424 (0.331-0.544) | 0.675 (0.58-0.786) | 0.935 (0.78-1.12) | |
| **2004** | 1.156 (0.962-1.39) | 0.486 (0.381-0.619) | 0.682 (0.586-0.793) | 1.035 (0.868-1.234) | |
| **2005** | 1.168 (0.968-1.408) | 0.451 (0.353-0.577) | 0.723 (0.622-0.84) | 1.017 (0.85-1.217) | |
| **2006** | 1.278 (1.056-1.546) | 0.473 (0.372-0.603) | 0.713 (0.614-0.828) | 0.997 (0.839-1.184) | |
| **2007** | 1.168 (0.96-1.421) | 0.522 (0.411-0.663) | 0.823 (0.711-0.953) | 1.128 (0.949-1.339) | |
| **2008** | 1.169 (0.967-1.413) | 0.462 (0.36-0.593) | 0.708 (0.608-0.825) | 1.06 (0.892-1.26) | |
| **2009** | 1.046 (0.861-1.272) | 0.447 (0.348-0.575) | 0.747 (0.646-0.864) | 0.852 (0.713-1.018) | |
| **2010** | 1.127 (0.921-1.379) | 0.546 (0.434-0.686) | 0.613 (0.526-0.715) | 1.028 (0.869-1.215) | |
| **2011** | 1.183 (0.975-1.434) | 0.561 (0.445-0.706) | 0.709 (0.61-0.824) | 0.945 (0.792-1.127) | |
| **2012** | 1.179 (0.97-1.434) | 0.542 (0.428-0.686) | 0.73 (0.632-0.843) | 1.084 (0.919-1.279) | |
| **2013** | 0.997 (0.805-1.234) | 0.702 (0.564-0.873) | 0.673 (0.582-0.778) | 0.914 (0.773-1.082) | |
| **2014** | 1.089 (0.883-1.343) | 0.583 (0.463-0.733) | 0.698 (0.603-0.808) | 1.101 (0.94-1.29) | |
| **2015** | 1.167 (0.948-1.436) | 0.626 (0.502-0.781) | 0.84 (0.733-0.964) | 1.111 (0.947-1.304) | |
| **2016** | 1.23 (0.999-1.513) | 0.627 (0.497-0.791) | 0.787 (0.684-0.906) | 1.088 (0.925-1.28) | |
| **2017** | 1.32 (1.067-1.633) | 0.827 (0.668-1.024) | 0.761 (0.661-0.876) | 1.219 (1.043-1.426) | |
| **2018** | 1.47 (1.212-1.783) | 0.678 (0.54-0.851) | 0.852 (0.745-0.974) | 1.344 (1.158-1.56) | |
| **2019** | 1.337 (1.087-1.645) | 0.786 (0.638-0.968) | 0.873 (0.762-1.001) | 1.141 (0.976-1.334) | |
| **2020** | 1.268 (1.044-1.541) | 0.828 (0.674-1.017) | 0.886 (0.772-1.017) | 1.26 (1.087-1.46) | |
| **35-44 Age Group** | | | | | |
| **1999** | 0.577 (0.531-0.628) | 0.268 (0.241-0.298) | 0.35 (0.326-0.376) | 0.517 (0.472-0.566) | |
| **2000** | 0.684 (0.629-0.745) | 0.283 (0.254-0.315) | 0.378 (0.351-0.407) | 0.537 (0.489-0.589) | |
| **2001** | 0.65 (0.595-0.71) | 0.283 (0.253-0.315) | 0.353 (0.327-0.38) | 0.597 (0.545-0.655) | |
| **2002** | 0.645 (0.59-0.704) | 0.262 (0.235-0.293) | 0.352 (0.326-0.379) | 0.498 (0.453-0.549) | |
| **2003** | 0.648 (0.593-0.709) | 0.264 (0.236-0.296) | 0.36 (0.333-0.388) | 0.536 (0.488-0.589) | |
| **2004** | 0.578 (0.527-0.634) | 0.252 (0.224-0.284) | 0.351 (0.325-0.379) | 0.519 (0.471-0.572) | |
| **2005** | 0.617 (0.563-0.677) | 0.269 (0.239-0.302) | 0.373 (0.346-0.403) | 0.518 (0.47-0.572) | |
| **2006** | 0.589 (0.535-0.649) | 0.263 (0.233-0.297) | 0.386 (0.358-0.416) | 0.526 (0.478-0.58) | |
| **2007** | 0.606 (0.549-0.668) | 0.266 (0.235-0.302) | 0.362 (0.334-0.392) | 0.551 (0.499-0.607) | |
| **2008** | 0.558 (0.503-0.619) | 0.292 (0.259-0.33) | 0.366 (0.337-0.396) | 0.576 (0.521-0.636) | |
| **2009** | 0.559 (0.504-0.621) | 0.247 (0.217-0.282) | 0.357 (0.329-0.388) | 0.579 (0.525-0.637) | |
| **2010** | 0.554 (0.497-0.619) | 0.254 (0.222-0.29) | 0.358 (0.33-0.389) | 0.544 (0.492-0.602) | |
| **2011** | 0.55 (0.492-0.615) | 0.302 (0.267-0.342) | 0.352 (0.323-0.382) | 0.58 (0.526-0.641) | |
| **2012** | 0.534 (0.476-0.599) | 0.259 (0.226-0.297) | 0.342 (0.314-0.372) | 0.556 (0.503-0.616) | |
| **2013** | 0.533 (0.476-0.597) | 0.306 (0.269-0.347) | 0.363 (0.334-0.395) | 0.596 (0.541-0.656) | |
| **2014** | 0.57 (0.507-0.64) | 0.342 (0.302-0.387) | 0.373 (0.344-0.405) | 0.611 (0.555-0.674) | |
| **2015** | 0.607 (0.538-0.684) | 0.273 (0.238-0.313) | 0.394 (0.363-0.428) | 0.589 (0.533-0.651) | |
| **2016** | 0.614 (0.545-0.692) | 0.321 (0.281-0.367) | 0.438 (0.404-0.474) | 0.666 (0.605-0.732) | |
| **2017** | 0.678 (0.601-0.764) | 0.393 (0.347-0.444) | 0.456 (0.422-0.493) | 0.655 (0.594-0.721) | |
| **2018** | 0.683 (0.604-0.771) | 0.389 (0.343-0.44) | 0.459 (0.424-0.496) | 0.64 (0.582-0.704) | |
| **2019** | 0.652 (0.577-0.737) | 0.436 (0.387-0.49) | 0.495 (0.459-0.535) | 0.677 (0.616-0.743) | |
| **2020** | 0.678 (0.604-0.761) | 0.471 (0.42-0.529) | 0.475 (0.44-0.513) | 0.722 (0.66-0.789) | |
| **45-54 Age Group** | | | | | |
| **1999** | 0.425 (0.404-0.447) | 0.222 (0.209-0.235) | 0.259 (0.248-0.27) | 0.367 (0.348-0.388) | |
| **2000** | 0.427 (0.406-0.45) | 0.212 (0.2-0.225) | 0.262 (0.251-0.273) | 0.378 (0.357-0.399) | |
| **2001** | 0.462 (0.44-0.486) | 0.216 (0.204-0.229) | 0.266 (0.255-0.277) | 0.406 (0.385-0.428) | |
| **2002** | 0.441 (0.419-0.464) | 0.223 (0.211-0.237) | 0.267 (0.256-0.278) | 0.37 (0.351-0.391) | |
| **2003** | 0.438 (0.417-0.461) | 0.218 (0.206-0.232) | 0.283 (0.272-0.295) | 0.382 (0.362-0.403) | |
| **2004** | 0.451 (0.428-0.474) | 0.216 (0.204-0.23) | 0.278 (0.267-0.29) | 0.4 (0.38-0.422) | |
| **2005** | 0.434 (0.412-0.457) | 0.225 (0.212-0.238) | 0.284 (0.273-0.296) | 0.389 (0.369-0.41) | |
| **2006** | 0.424 (0.403-0.446) | 0.239 (0.225-0.253) | 0.287 (0.276-0.298) | 0.403 (0.382-0.425) | |
| **2007** | 0.427 (0.405-0.449) | 0.225 (0.212-0.238) | 0.29 (0.278-0.301) | 0.413 (0.392-0.434) | |
| **2008** | 0.443 (0.421-0.467) | 0.227 (0.214-0.24) | 0.296 (0.285-0.308) | 0.427 (0.406-0.45) | |
| **2009** | 0.435 (0.413-0.458) | 0.249 (0.235-0.263) | 0.301 (0.29-0.313) | 0.421 (0.4-0.443) | |
| **2010** | 0.424 (0.403-0.447) | 0.232 (0.219-0.246) | 0.296 (0.285-0.308) | 0.416 (0.395-0.438) | |
| **2011** | 0.416 (0.394-0.439) | 0.242 (0.228-0.256) | 0.307 (0.296-0.319) | 0.444 (0.422-0.467) | |
| **2012** | 0.407 (0.385-0.43) | 0.239 (0.225-0.253) | 0.304 (0.292-0.316) | 0.456 (0.433-0.48) | |
| **2013** | 0.428 (0.405-0.453) | 0.255 (0.241-0.27) | 0.312 (0.3-0.325) | 0.444 (0.421-0.467) | |
| **2014** | 0.427 (0.403-0.452) | 0.248 (0.234-0.263) | 0.302 (0.29-0.314) | 0.479 (0.455-0.505) | |
| **2015** | 0.442 (0.417-0.468) | 0.272 (0.257-0.289) | 0.323 (0.311-0.337) | 0.462 (0.439-0.487) | |
| **2016** | 0.441 (0.416-0.468) | 0.27 (0.254-0.287) | 0.344 (0.33-0.357) | 0.478 (0.453-0.504) | |
| **2017** | 0.479 (0.452-0.508) | 0.293 (0.276-0.312) | 0.346 (0.332-0.36) | 0.504 (0.478-0.531) | |
| **2018** | 0.449 (0.422-0.478) | 0.308 (0.29-0.327) | 0.355 (0.341-0.37) | 0.478 (0.453-0.505) | |
| **2019** | 0.455 (0.427-0.484) | 0.317 (0.298-0.337) | 0.359 (0.344-0.374) | 0.486 (0.46-0.513) | |
| **2020** | 0.477 (0.448-0.508) | 0.335 (0.315-0.356) | 0.397 (0.382-0.413) | 0.519 (0.492-0.547) | |
| **55-64 Age Group** | | | | | |
| **1999** | 0.383 (0.369-0.397) | 0.24 (0.231-0.249) | 0.266 (0.258-0.273) | 0.334 (0.321-0.347) | |
| **2000** | 0.392 (0.378-0.407) | 0.233 (0.224-0.243) | 0.263 (0.255-0.27) | 0.337 (0.324-0.35) | |
| **2001** | 0.397 (0.383-0.411) | 0.241 (0.232-0.25) | 0.271 (0.264-0.279) | 0.363 (0.349-0.377) | |
| **2002** | 0.383 (0.37-0.397) | 0.247 (0.238-0.257) | 0.266 (0.259-0.273) | 0.336 (0.324-0.349) | |
| **2003** | 0.384 (0.37-0.398) | 0.243 (0.234-0.252) | 0.272 (0.264-0.28) | 0.341 (0.329-0.354) | |
| **2004** | 0.393 (0.38-0.408) | 0.247 (0.238-0.257) | 0.274 (0.267-0.282) | 0.36 (0.347-0.374) | |
| **2005** | 0.4 (0.387-0.415) | 0.255 (0.246-0.265) | 0.279 (0.272-0.287) | 0.365 (0.352-0.378) | |
| **2006** | 0.398 (0.384-0.412) | 0.258 (0.248-0.267) | 0.289 (0.282-0.297) | 0.358 (0.345-0.371) | |
| **2007** | 0.412 (0.398-0.426) | 0.257 (0.248-0.267) | 0.295 (0.287-0.303) | 0.373 (0.36-0.386) | |
| **2008** | 0.399 (0.385-0.413) | 0.265 (0.256-0.275) | 0.299 (0.292-0.307) | 0.389 (0.376-0.403) | |
| **2009** | 0.398 (0.384-0.412) | 0.258 (0.249-0.268) | 0.304 (0.296-0.312) | 0.387 (0.374-0.4) | |
| **2010** | 0.401 (0.387-0.415) | 0.258 (0.249-0.267) | 0.307 (0.3-0.315) | 0.4 (0.387-0.413) | |
| **2011** | 0.397 (0.384-0.411) | 0.27 (0.26-0.279) | 0.309 (0.301-0.316) | 0.397 (0.384-0.41) | |
| **2012** | 0.382 (0.369-0.395) | 0.268 (0.259-0.278) | 0.314 (0.306-0.321) | 0.414 (0.401-0.428) | |
| **2013** | 0.395 (0.381-0.409) | 0.278 (0.269-0.288) | 0.323 (0.315-0.331) | 0.418 (0.405-0.432) | |
| **2014** | 0.388 (0.375-0.402) | 0.273 (0.264-0.283) | 0.323 (0.315-0.33) | 0.428 (0.415-0.442) | |
| **2015** | 0.392 (0.379-0.406) | 0.275 (0.266-0.284) | 0.321 (0.313-0.328) | 0.417 (0.405-0.431) | |
| **2016** | 0.4 (0.387-0.414) | 0.288 (0.279-0.298) | 0.334 (0.327-0.342) | 0.431 (0.418-0.445) | |
| **2017** | 0.407 (0.393-0.421) | 0.306 (0.296-0.316) | 0.348 (0.34-0.356) | 0.433 (0.42-0.447) | |
| **2018** | 0.407 (0.393-0.421) | 0.309 (0.299-0.319) | 0.357 (0.349-0.365) | 0.442 (0.429-0.456) | |
| **2019** | 0.414 (0.4-0.429) | 0.32 (0.31-0.33) | 0.364 (0.356-0.372) | 0.462 (0.448-0.476) | |
| **2020** | 0.45 (0.435-0.465) | 0.36 (0.349-0.371) | 0.402 (0.393-0.41) | 0.501 (0.487-0.516) | |
| **65-74 Age Group** | | | | | |
| **1999** | 0.424 (0.413-0.434) | 0.312 (0.304-0.32) | 0.32 (0.313-0.326) | 0.385 (0.375-0.396) | |
| **2000** | 0.427 (0.417-0.438) | 0.307 (0.299-0.315) | 0.319 (0.313-0.326) | 0.39 (0.379-0.401) | |
| **2001** | 0.427 (0.416-0.438) | 0.32 (0.311-0.328) | 0.325 (0.319-0.332) | 0.399 (0.388-0.41) | |
| **2002** | 0.426 (0.415-0.437) | 0.318 (0.309-0.326) | 0.333 (0.327-0.34) | 0.392 (0.381-0.403) | |
| **2003** | 0.424 (0.412-0.435) | 0.326 (0.318-0.335) | 0.332 (0.325-0.339) | 0.4 (0.389-0.411) | |
| **2004** | 0.44 (0.428-0.452) | 0.323 (0.314-0.332) | 0.328 (0.321-0.335) | 0.407 (0.395-0.418) | |
| **2005** | 0.435 (0.424-0.448) | 0.332 (0.323-0.341) | 0.329 (0.322-0.336) | 0.405 (0.394-0.417) | |
| **2006** | 0.44 (0.428-0.452) | 0.337 (0.328-0.347) | 0.344 (0.337-0.351) | 0.407 (0.396-0.419) | |
| **2007** | 0.446 (0.434-0.459) | 0.338 (0.329-0.348) | 0.344 (0.337-0.352) | 0.414 (0.402-0.426) | |
| **2008** | 0.446 (0.434-0.459) | 0.337 (0.328-0.346) | 0.346 (0.339-0.354) | 0.427 (0.415-0.439) | |
| **2009** | 0.434 (0.422-0.446) | 0.328 (0.319-0.338) | 0.348 (0.341-0.355) | 0.427 (0.415-0.439) | |
| **2010** | 0.439 (0.427-0.452) | 0.33 (0.321-0.34) | 0.353 (0.346-0.36) | 0.438 (0.426-0.45) | |
| **2011** | 0.431 (0.419-0.444) | 0.327 (0.318-0.336) | 0.357 (0.349-0.364) | 0.437 (0.426-0.449) | |
| **2012** | 0.429 (0.417-0.441) | 0.328 (0.32-0.337) | 0.358 (0.351-0.365) | 0.449 (0.437-0.461) | |
| **2013** | 0.426 (0.415-0.438) | 0.332 (0.323-0.341) | 0.367 (0.36-0.374) | 0.44 (0.429-0.452) | |
| **2014** | 0.423 (0.411-0.435) | 0.333 (0.325-0.342) | 0.363 (0.356-0.37) | 0.447 (0.435-0.458) | |
| **2015** | 0.426 (0.414-0.438) | 0.337 (0.329-0.346) | 0.361 (0.354-0.367) | 0.448 (0.437-0.459) | |
| **2016** | 0.426 (0.415-0.438) | 0.346 (0.338-0.355) | 0.378 (0.372-0.385) | 0.45 (0.439-0.461) | |
| **2017** | 0.429 (0.418-0.44) | 0.356 (0.348-0.365) | 0.392 (0.386-0.4) | 0.462 (0.451-0.473) | |
| **2018** | 0.434 (0.422-0.445) | 0.36 (0.352-0.369) | 0.404 (0.397-0.412) | 0.469 (0.458-0.48) | |
| **2019** | 0.438 (0.427-0.45) | 0.38 (0.371-0.389) | 0.413 (0.406-0.42) | 0.478 (0.467-0.489) | |
| **2020** | 0.493 (0.481-0.505) | 0.424 (0.414-0.433) | 0.462 (0.455-0.47) | 0.529 (0.518-0.541) | |
| **75-84 Age Group** | | | | | |
| **1999** | 0.491 (0.481-0.502) | 0.405 (0.396-0.413) | 0.399 (0.392-0.406) | 0.466 (0.456-0.477) | |
| **2000** | 0.496 (0.486-0.507) | 0.403 (0.395-0.412) | 0.401 (0.394-0.408) | 0.471 (0.461-0.482) | |
| **2001** | 0.492 (0.482-0.502) | 0.402 (0.394-0.411) | 0.397 (0.39-0.404) | 0.472 (0.462-0.483) | |
| **2002** | 0.503 (0.493-0.514) | 0.413 (0.404-0.422) | 0.41 (0.403-0.417) | 0.48 (0.469-0.491) | |
| **2003** | 0.493 (0.483-0.504) | 0.415 (0.406-0.424) | 0.409 (0.402-0.416) | 0.477 (0.467-0.488) | |
| **2004** | 0.499 (0.488-0.509) | 0.415 (0.406-0.424) | 0.407 (0.4-0.414) | 0.482 (0.472-0.493) | |
| **2005** | 0.507 (0.496-0.517) | 0.428 (0.419-0.437) | 0.415 (0.408-0.422) | 0.489 (0.479-0.5) | |
| **2006** | 0.51 (0.499-0.521) | 0.433 (0.424-0.442) | 0.415 (0.408-0.423) | 0.485 (0.474-0.496) | |
| **2007** | 0.517 (0.506-0.528) | 0.431 (0.421-0.44) | 0.42 (0.413-0.428) | 0.49 (0.479-0.502) | |
| **2008** | 0.51 (0.499-0.521) | 0.431 (0.422-0.44) | 0.423 (0.415-0.43) | 0.501 (0.489-0.512) | |
| **2009** | 0.511 (0.499-0.522) | 0.422 (0.413-0.431) | 0.423 (0.416-0.431) | 0.501 (0.489-0.512) | |
| **2010** | 0.518 (0.506-0.529) | 0.424 (0.415-0.434) | 0.432 (0.424-0.44) | 0.513 (0.502-0.525) | |
| **2011** | 0.511 (0.5-0.523) | 0.435 (0.425-0.445) | 0.43 (0.422-0.438) | 0.515 (0.504-0.527) | |
| **2012** | 0.495 (0.483-0.506) | 0.43 (0.421-0.44) | 0.436 (0.428-0.444) | 0.52 (0.508-0.532) | |
| **2013** | 0.493 (0.482-0.505) | 0.426 (0.416-0.436) | 0.437 (0.429-0.445) | 0.525 (0.513-0.537) | |
| **2014** | 0.5 (0.488-0.512) | 0.426 (0.416-0.436) | 0.427 (0.419-0.435) | 0.515 (0.503-0.527) | |
| **2015** | 0.498 (0.486-0.51) | 0.428 (0.418-0.438) | 0.429 (0.422-0.437) | 0.519 (0.507-0.531) | |
| **2016** | 0.494 (0.482-0.506) | 0.428 (0.418-0.438) | 0.448 (0.44-0.456) | 0.529 (0.518-0.541) | |
| **2017** | 0.497 (0.485-0.509) | 0.438 (0.428-0.448) | 0.455 (0.447-0.463) | 0.537 (0.525-0.549) | |
| **2018** | 0.506 (0.494-0.519) | 0.445 (0.435-0.455) | 0.466 (0.458-0.474) | 0.545 (0.533-0.557) | |
| **2019** | 0.503 (0.491-0.515) | 0.456 (0.446-0.466) | 0.487 (0.479-0.495) | 0.551 (0.539-0.563) | |
| **2020** | 0.576 (0.563-0.59) | 0.518 (0.508-0.529) | 0.536 (0.527-0.544) | 0.598 (0.586-0.61) | |
| **85+ Age Group** | | | | |
| **1999** | 0.595 (0.58-0.61) | 0.53 (0.517-0.544) | 0.499 (0.488-0.51) | 0.585 (0.569-0.602) | |
| **2000** | 0.592 (0.578-0.607) | 0.531 (0.518-0.545) | 0.498 (0.488-0.51) | 0.578 (0.562-0.594) | |
| **2001** | 0.598 (0.583-0.613) | 0.531 (0.518-0.545) | 0.511 (0.499-0.522) | 0.572 (0.556-0.588) | |
| **2002** | 0.593 (0.578-0.608) | 0.536 (0.523-0.549) | 0.506 (0.495-0.518) | 0.588 (0.572-0.604) | |
| **2003** | 0.596 (0.582-0.611) | 0.541 (0.528-0.555) | 0.507 (0.496-0.519) | 0.585 (0.569-0.601) | |
| **2004** | 0.594 (0.579-0.609) | 0.547 (0.534-0.561) | 0.504 (0.492-0.515) | 0.579 (0.563-0.595) | |
| **2005** | 0.59 (0.575-0.604) | 0.553 (0.54-0.567) | 0.513 (0.502-0.525) | 0.589 (0.574-0.605) | |
| **2006** | 0.593 (0.579-0.608) | 0.549 (0.536-0.563) | 0.512 (0.5-0.523) | 0.604 (0.589-0.62) | |
| **2007** | 0.605 (0.59-0.62) | 0.547 (0.534-0.56) | 0.515 (0.504-0.527) | 0.594 (0.579-0.609) | |
| **2008** | 0.591 (0.577-0.606) | 0.548 (0.535-0.561) | 0.511 (0.5-0.523) | 0.599 (0.583-0.614) | |
| **2009** | 0.586 (0.572-0.6) | 0.546 (0.533-0.56) | 0.515 (0.504-0.527) | 0.599 (0.584-0.614) | |
| **2010** | 0.595 (0.581-0.609) | 0.536 (0.523-0.549) | 0.517 (0.506-0.528) | 0.607 (0.592-0.622) | |
| **2011** | 0.605 (0.591-0.62) | 0.547 (0.534-0.56) | 0.519 (0.508-0.53) | 0.608 (0.594-0.623) | |
| **2012** | 0.598 (0.584-0.613) | 0.546 (0.533-0.559) | 0.52 (0.51-0.531) | 0.619 (0.604-0.634) | |
| **2013** | 0.586 (0.573-0.601) | 0.528 (0.516-0.541) | 0.522 (0.511-0.533) | 0.621 (0.606-0.636) | |
| **2014** | 0.586 (0.572-0.6) | 0.526 (0.514-0.539) | 0.493 (0.482-0.503) | 0.621 (0.607-0.636) | |
| **2015** | 0.579 (0.566-0.593) | 0.531 (0.519-0.544) | 0.497 (0.487-0.508) | 0.61 (0.596-0.624) | |
| **2016** | 0.576 (0.562-0.59) | 0.533 (0.521-0.546) | 0.505 (0.494-0.515) | 0.612 (0.598-0.627) | |
| **2017** | 0.581 (0.567-0.595) | 0.537 (0.525-0.55) | 0.524 (0.514-0.535) | 0.619 (0.605-0.633) | |
| **2018** | 0.583 (0.569-0.597) | 0.537 (0.525-0.55) | 0.54 (0.529-0.551) | 0.625 (0.611-0.639) | |
| **2019** | 0.58 (0.566-0.594) | 0.549 (0.536-0.562) | 0.555 (0.544-0.566) | 0.631 (0.617-0.645) | |
| **2020** | 0.658 (0.643-0.673) | 0.614 (0.6-0.628) | 0.607 (0.595-0.618) | 0.683 (0.669-0.698) | |

| **Supplemental Table 6** CVD Burden in Malignant Neoplasm-Related Reporting Odds Ratio Stratified by Race in the Unites States, 1999-2020 | | | | | |
| --- | --- | --- | --- | --- | --- |
| **Reporting Odds Ratio (95% CI)** | | | | | |
| **Year** | **American Indian or Alaska Native** | **Asian or Pacific Islander** | **Black or African American** | **White** | **Hispanic or Latino** |
| **15-24 Age Group** | | | | | |
| **1999** | Suppressed | 3.318 (1.854-5.938) | 1.43 (1.074-1.903) | 1.749 (1.489-2.055) | 2.852 (2.127-3.824) |
| **2000** | Suppressed | 2.12 (1.227-3.664) | 1.926 (1.47-2.523) | 1.676 (1.416-1.984) | 2.651 (1.958-3.588) |
| **2001** | Suppressed | 2.56 (1.425-4.599) | 1.814 (1.353-2.431) | 1.678 (1.42-1.982) | 2.796 (2.092-3.738) |
| **2002** | Suppressed | 1.904 (1.02-3.554) | 1.621 (1.176-2.233) | 1.695 (1.435-2.002) | 2.865 (2.185-3.758) |
| **2003** | Suppressed | 2.183 (1.188-4.014) | 1.454 (1.054-2.006) | 1.478 (1.24-1.763) | 2.943 (2.218-3.903) |
| **2004** | Suppressed | 1.923 (1.063-3.477) | 1.712 (1.3-2.254) | 1.783 (1.509-2.107) | 2.975 (2.265-3.908) |
| **2005** | Suppressed | 2.068 (1.219-3.508) | 1.718 (1.271-2.322) | 1.53 (1.285-1.821) | 3.236 (2.517-4.162) |
| **2006** | Suppressed | 1.639 (0.852-3.152) | 1.73 (1.277-2.343) | 1.588 (1.329-1.897) | 2.81 (2.152-3.67) |
| **2007** | Suppressed | 1.821 (0.981-3.378) | 1.956 (1.47-2.602) | 1.908 (1.613-2.256) | 2.278 (1.739-2.985) |
| **2008** | Suppressed | 1.667 (0.938-2.962) | 1.5 (1.115-2.019) | 1.611 (1.345-1.93) | 2.238 (1.703-2.941) |
| **2009** | Suppressed | 1.569 (0.888-2.774) | 1.572 (1.186-2.082) | 1.666 (1.4-1.983) | 1.839 (1.381-2.449) |
| **2010** | Suppressed | 2.114 (1.237-3.612) | 1.569 (1.161-2.12) | 1.469 (1.226-1.76) | 2.303 (1.763-3.009) |
| **2011** | Suppressed | 2.24 (1.307-3.839) | 2.035 (1.536-2.696) | 1.503 (1.244-1.816) | 1.94 (1.496-2.516) |
| **2012** | Suppressed | 2.08 (1.265-3.42) | 1.397 (0.996-1.96) | 1.595 (1.324-1.922) | 1.884 (1.431-2.481) |
| **2013** | Suppressed | 0.945 (0.519-1.719) | 1.5 (1.082-2.079) | 1.571 (1.298-1.901) | 2.27 (1.741-2.958) |
| **2014** | Suppressed | 1.685 (0.955-2.974) | 1.933 (1.452-2.574) | 1.474 (1.218-1.784) | 2.321 (1.794-3.002) |
| **2015** | Suppressed | 1.401 (0.779-2.52) | 1.657 (1.204-2.281) | 1.669 (1.379-2.02) | 2.843 (2.214-3.649) |
| **2016** | Suppressed | 1.761 (0.991-3.13) | 1.818 (1.319-2.506) | 1.414 (1.143-1.749) | 3.2 (2.515-4.071) |
| **2017** | Suppressed | 1.647 (0.955-2.84) | 2.014 (1.471-2.758) | 1.918 (1.57-2.342) | 3.211 (2.532-4.071) |
| **2018** | Suppressed | 2.092 (1.198-3.654) | 2.102 (1.545-2.86) | 1.546 (1.26-1.895) | 2.334 (1.797-3.031) |
| **2019** | Suppressed | 1.79 (1.003-3.195) | 2.071 (1.515-2.83) | 1.671 (1.365-2.046) | 2.572 (2.038-3.247) |
| **2020** | Suppressed | 1.441 (0.79-2.628) | 2.339 (1.69-3.237) | 1.53 (1.233-1.897) | 2.51 (1.976-3.189) |
| **25-34 Age Group** | | | | | |
| **1999** | Suppressed | 0.97 (0.648-1.452) | 0.757 (0.629-0.91) | 0.762 (0.684-0.848) | 1.216 (0.978-1.513) |
| **2000** | Suppressed | 1.229 (0.825-1.832) | 0.893 (0.738-1.079) | 0.76 (0.678-0.851) | 1.42 (1.139-1.769) |
| **2001** | Suppressed | 0.985 (0.656-1.481) | 0.941 (0.786-1.126) | 0.751 (0.67-0.841) | 1.449 (1.164-1.804) |
| **2002** | Suppressed | 0.828 (0.554-1.238) | 0.726 (0.593-0.888) | 0.691 (0.613-0.778) | 0.999 (0.785-1.272) |
| **2003** | Suppressed | 0.738 (0.493-1.103) | 0.79 (0.652-0.958) | 0.744 (0.661-0.837) | 1.34 (1.085-1.656) |
| **2004** | Suppressed | 1.016 (0.689-1.499) | 0.779 (0.643-0.944) | 0.711 (0.63-0.804) | 1.333 (1.077-1.649) |
| **2005** | Suppressed | 0.939 (0.652-1.354) | 0.656 (0.536-0.804) | 0.768 (0.68-0.868) | 1.246 (1.002-1.548) |
| **2006** | Suppressed | 0.746 (0.505-1.103) | 0.759 (0.623-0.925) | 0.743 (0.657-0.84) | 1.305 (1.066-1.598) |
| **2007** | Suppressed | 0.998 (0.683-1.458) | 0.801 (0.658-0.975) | 0.833 (0.736-0.943) | 1.245 (1.02-1.52) |
| **2008** | Suppressed | 0.729 (0.498-1.067) | 0.757 (0.618-0.926) | 0.814 (0.719-0.921) | 1.035 (0.845-1.269) |
| **2009** | Suppressed | 0.693 (0.448-1.071) | 0.626 (0.507-0.773) | 0.737 (0.651-0.834) | 1.059 (0.872-1.285) |
| **2010** | Suppressed | 0.937 (0.647-1.357) | 0.725 (0.59-0.89) | 0.697 (0.615-0.791) | 1.032 (0.849-1.254) |
| **2011** | Suppressed | 0.618 (0.399-0.957) | 0.807 (0.669-0.974) | 0.779 (0.688-0.882) | 0.977 (0.795-1.2) |
| **2012** | Suppressed | 0.805 (0.559-1.16) | 0.752 (0.617-0.917) | 0.792 (0.701-0.896) | 1.036 (0.854-1.258) |
| **2013** | Suppressed | 0.901 (0.622-1.304) | 0.702 (0.576-0.855) | 0.752 (0.663-0.853) | 0.957 (0.79-1.158) |
| **2014** | Suppressed | 0.808 (0.554-1.18) | 0.716 (0.589-0.87) | 0.841 (0.746-0.948) | 0.944 (0.773-1.154) |
| **2015** | Suppressed | 0.953 (0.652-1.392) | 0.903 (0.75-1.088) | 0.819 (0.724-0.925) | 1.171 (0.979-1.4) |
| **2016** | Suppressed | 0.762 (0.525-1.106) | 0.841 (0.692-1.023) | 0.817 (0.722-0.925) | 1.216 (1.011-1.461) |
| **2017** | Suppressed | 0.86 (0.599-1.235) | 0.796 (0.655-0.968) | 0.926 (0.819-1.047) | 1.255 (1.055-1.494) |
| **2018** | Suppressed | 1.063 (0.766-1.476) | 0.83 (0.687-1.002) | 1.01 (0.9-1.132) | 1.276 (1.067-1.524) |
| **2019** | Suppressed | 0.905 (0.641-1.279) | 0.943 (0.785-1.132) | 0.974 (0.863-1.099) | 1.105 (0.926-1.318) |
| **2020** | Suppressed | 0.875 (0.626-1.221) | 0.997 (0.832-1.194) | 0.987 (0.879-1.109) | 1.225 (1.031-1.456) |
| **35-44 Age Group** | | | | | |
| **1999** | Suppressed | 0.521 (0.413-0.657) | 0.408 (0.372-0.446) | 0.384 (0.364-0.405) | 0.628 (0.548-0.721) |
| **2000** | Suppressed | 0.571 (0.459-0.711) | 0.46 (0.42-0.505) | 0.401 (0.379-0.423) | 0.747 (0.653-0.854) |
| **2001** | Suppressed | 0.467 (0.369-0.591) | 0.449 (0.409-0.493) | 0.398 (0.377-0.421) | 0.71 (0.621-0.813) |
| **2002** | Suppressed | 0.407 (0.319-0.52) | 0.456 (0.414-0.501) | 0.371 (0.35-0.392) | 0.646 (0.564-0.74) |
| **2003** | Suppressed | 0.48 (0.384-0.601) | 0.445 (0.404-0.489) | 0.383 (0.361-0.405) | 0.664 (0.581-0.76) |
| **2004** | Suppressed | 0.392 (0.305-0.504) | 0.42 (0.381-0.464) | 0.375 (0.353-0.398) | 0.598 (0.523-0.684) |
| **2005** | Suppressed | 0.36 (0.28-0.462) | 0.424 (0.383-0.469) | 0.402 (0.38-0.426) | 0.624 (0.547-0.712) |
| **2006** | Suppressed | 0.45 (0.359-0.563) | 0.421 (0.381-0.466) | 0.39 (0.367-0.414) | 0.66 (0.58-0.751) |
| **2007** | Suppressed | 0.444 (0.354-0.556) | 0.447 (0.404-0.495) | 0.389 (0.365-0.414) | 0.589 (0.517-0.671) |
| **2008** | Suppressed | 0.473 (0.378-0.592) | 0.417 (0.376-0.463) | 0.393 (0.368-0.419) | 0.59 (0.519-0.672) |
| **2009** | Suppressed | 0.454 (0.366-0.564) | 0.383 (0.343-0.427) | 0.389 (0.365-0.415) | 0.609 (0.537-0.692) |
| **2010** | Suppressed | 0.438 (0.35-0.548) | 0.366 (0.327-0.41) | 0.378 (0.353-0.404) | 0.604 (0.531-0.686) |
| **2011** | Suppressed | 0.424 (0.338-0.531) | 0.42 (0.378-0.467) | 0.395 (0.369-0.422) | 0.537 (0.471-0.613) |
| **2012** | Suppressed | 0.409 (0.33-0.507) | 0.405 (0.362-0.453) | 0.367 (0.342-0.393) | 0.521 (0.457-0.592) |
| **2013** | Suppressed | 0.386 (0.31-0.481) | 0.416 (0.372-0.465) | 0.396 (0.37-0.424) | 0.611 (0.542-0.689) |
| **2014** | Suppressed | 0.376 (0.299-0.472) | 0.388 (0.347-0.434) | 0.427 (0.399-0.457) | 0.626 (0.558-0.703) |
| **2015** | Suppressed | 0.412 (0.335-0.507) | 0.403 (0.36-0.451) | 0.422 (0.393-0.453) | 0.525 (0.464-0.593) |
| **2016** | Suppressed | 0.397 (0.323-0.487) | 0.432 (0.386-0.483) | 0.482 (0.45-0.516) | 0.631 (0.562-0.708) |
| **2017** | Suppressed | 0.46 (0.374-0.567) | 0.464 (0.416-0.517) | 0.505 (0.472-0.54) | 0.622 (0.554-0.698) |
| **2018** | Suppressed | 0.377 (0.302-0.47) | 0.441 (0.395-0.493) | 0.523 (0.489-0.559) | 0.628 (0.561-0.703) |
| **2019** | Suppressed | 0.481 (0.392-0.591) | 0.512 (0.462-0.568) | 0.528 (0.493-0.565) | 0.65 (0.582-0.726) |
| **2020** | Suppressed | 0.482 (0.395-0.587) | 0.512 (0.461-0.568) | 0.556 (0.521-0.593) | 0.671 (0.604-0.746) |
| **45-54 Age Group** | | | | | |
| **1999** | 0.445 (0.317-0.626) | 0.37 (0.318-0.43) | 0.342 (0.324-0.362) | 0.283 (0.275-0.292) | 0.423 (0.384-0.466) |
| **2000** | 0.412 (0.289-0.586) | 0.368 (0.317-0.428) | 0.347 (0.328-0.367) | 0.28 (0.272-0.289) | 0.443 (0.402-0.487) |
| **2001** | 0.339 (0.242-0.475) | 0.369 (0.32-0.426) | 0.357 (0.338-0.377) | 0.292 (0.283-0.301) | 0.483 (0.442-0.529) |
| **2002** | 0.35 (0.254-0.484) | 0.349 (0.302-0.402) | 0.338 (0.32-0.357) | 0.289 (0.28-0.298) | 0.451 (0.411-0.494) |
| **2003** | 0.3 (0.214-0.421) | 0.356 (0.309-0.41) | 0.35 (0.332-0.369) | 0.294 (0.285-0.303) | 0.434 (0.397-0.475) |
| **2004** | 0.37 (0.271-0.505) | 0.37 (0.322-0.424) | 0.343 (0.325-0.362) | 0.3 (0.291-0.309) | 0.446 (0.409-0.487) |
| **2005** | 0.365 (0.271-0.492) | 0.344 (0.299-0.395) | 0.344 (0.327-0.363) | 0.299 (0.291-0.309) | 0.429 (0.394-0.468) |
| **2006** | 0.392 (0.291-0.53) | 0.351 (0.305-0.403) | 0.335 (0.317-0.353) | 0.309 (0.3-0.318) | 0.432 (0.397-0.47) |
| **2007** | 0.39 (0.288-0.527) | 0.359 (0.312-0.412) | 0.338 (0.321-0.357) | 0.305 (0.296-0.315) | 0.442 (0.407-0.479) |
| **2008** | 0.368 (0.277-0.489) | 0.371 (0.324-0.425) | 0.352 (0.334-0.371) | 0.312 (0.303-0.322) | 0.439 (0.404-0.476) |
| **2009** | 0.345 (0.258-0.462) | 0.406 (0.356-0.463) | 0.354 (0.336-0.373) | 0.317 (0.308-0.327) | 0.44 (0.407-0.477) |
| **2010** | 0.336 (0.251-0.45) | 0.356 (0.312-0.407) | 0.335 (0.318-0.354) | 0.311 (0.302-0.321) | 0.419 (0.387-0.453) |
| **2011** | 0.43 (0.331-0.557) | 0.323 (0.283-0.369) | 0.343 (0.325-0.362) | 0.323 (0.314-0.333) | 0.419 (0.387-0.453) |
| **2012** | 0.452 (0.345-0.591) | 0.323 (0.283-0.37) | 0.337 (0.319-0.356) | 0.32 (0.311-0.33) | 0.433 (0.402-0.468) |
| **2013** | 0.444 (0.341-0.579) | 0.319 (0.28-0.365) | 0.352 (0.333-0.372) | 0.329 (0.319-0.339) | 0.429 (0.397-0.463) |
| **2014** | 0.359 (0.268-0.48) | 0.341 (0.3-0.388) | 0.341 (0.322-0.361) | 0.329 (0.319-0.339) | 0.451 (0.419-0.485) |
| **2015** | 0.388 (0.294-0.51) | 0.332 (0.292-0.378) | 0.354 (0.334-0.374) | 0.345 (0.334-0.356) | 0.458 (0.426-0.493) |
| **2016** | 0.49 (0.38-0.633) | 0.346 (0.304-0.393) | 0.351 (0.331-0.372) | 0.362 (0.35-0.373) | 0.454 (0.422-0.489) |
| **2017** | 0.502 (0.386-0.653) | 0.369 (0.327-0.417) | 0.377 (0.356-0.4) | 0.371 (0.359-0.383) | 0.493 (0.46-0.529) |
| **2018** | 0.463 (0.353-0.607) | 0.345 (0.304-0.392) | 0.377 (0.355-0.4) | 0.375 (0.363-0.387) | 0.462 (0.431-0.496) |
| **2019** | 0.498 (0.381-0.651) | 0.343 (0.303-0.388) | 0.377 (0.354-0.4) | 0.385 (0.373-0.398) | 0.455 (0.424-0.489) |
| **2020** | 0.475 (0.361-0.624) | 0.382 (0.34-0.43) | 0.444 (0.419-0.47) | 0.399 (0.386-0.412) | 0.518 (0.485-0.554) |
| **55-64 Age Group** | | | | | |
| **1999** | 0.339 (0.265-0.433) | 0.344 (0.305-0.387) | 0.341 (0.327-0.355) | 0.283 (0.277-0.288) | 0.37 (0.343-0.399) |
| **2000** | 0.38 (0.301-0.479) | 0.366 (0.325-0.411) | 0.343 (0.329-0.358) | 0.28 (0.275-0.286) | 0.39 (0.362-0.42) |
| **2001** | 0.325 (0.257-0.411) | 0.367 (0.328-0.412) | 0.36 (0.346-0.376) | 0.289 (0.283-0.295) | 0.405 (0.377-0.435) |
| **2002** | 0.345 (0.275-0.434) | 0.348 (0.31-0.389) | 0.348 (0.334-0.363) | 0.283 (0.278-0.289) | 0.372 (0.346-0.4) |
| **2003** | 0.312 (0.246-0.395) | 0.324 (0.289-0.364) | 0.346 (0.332-0.361) | 0.288 (0.282-0.294) | 0.37 (0.345-0.397) |
| **2004** | 0.369 (0.299-0.456) | 0.344 (0.308-0.385) | 0.349 (0.335-0.363) | 0.295 (0.289-0.3) | 0.387 (0.362-0.415) |
| **2005** | 0.315 (0.254-0.392) | 0.366 (0.33-0.406) | 0.348 (0.334-0.362) | 0.301 (0.296-0.307) | 0.391 (0.365-0.418) |
| **2006** | 0.365 (0.296-0.452) | 0.325 (0.293-0.362) | 0.364 (0.35-0.378) | 0.303 (0.297-0.309) | 0.383 (0.358-0.409) |
| **2007** | 0.351 (0.286-0.43) | 0.358 (0.323-0.396) | 0.362 (0.348-0.376) | 0.312 (0.306-0.318) | 0.391 (0.367-0.417) |
| **2008** | 0.336 (0.273-0.414) | 0.348 (0.314-0.385) | 0.356 (0.343-0.37) | 0.318 (0.312-0.324) | 0.398 (0.374-0.423) |
| **2009** | 0.406 (0.337-0.489) | 0.389 (0.354-0.428) | 0.358 (0.345-0.372) | 0.314 (0.308-0.32) | 0.381 (0.358-0.405) |
| **2010** | 0.363 (0.302-0.436) | 0.366 (0.333-0.402) | 0.349 (0.337-0.363) | 0.321 (0.315-0.327) | 0.401 (0.378-0.426) |
| **2011** | 0.378 (0.313-0.457) | 0.342 (0.312-0.375) | 0.357 (0.344-0.37) | 0.322 (0.316-0.327) | 0.41 (0.387-0.434) |
| **2012** | 0.377 (0.314-0.453) | 0.324 (0.295-0.356) | 0.356 (0.344-0.369) | 0.326 (0.32-0.332) | 0.4 (0.378-0.423) |
| **2013** | 0.362 (0.303-0.434) | 0.332 (0.303-0.363) | 0.37 (0.357-0.383) | 0.332 (0.326-0.338) | 0.418 (0.396-0.442) |
| **2014** | 0.371 (0.311-0.444) | 0.341 (0.312-0.373) | 0.361 (0.349-0.374) | 0.332 (0.326-0.338) | 0.427 (0.405-0.451) |
| **2015** | 0.421 (0.356-0.498) | 0.352 (0.322-0.383) | 0.352 (0.34-0.364) | 0.33 (0.325-0.336) | 0.421 (0.4-0.444) |
| **2016** | 0.372 (0.315-0.44) | 0.352 (0.323-0.383) | 0.366 (0.353-0.378) | 0.344 (0.338-0.35) | 0.424 (0.403-0.446) |
| **2017** | 0.405 (0.345-0.474) | 0.334 (0.307-0.364) | 0.377 (0.365-0.391) | 0.357 (0.351-0.363) | 0.43 (0.409-0.452) |
| **2018** | 0.426 (0.363-0.5) | 0.353 (0.325-0.383) | 0.384 (0.371-0.397) | 0.364 (0.357-0.37) | 0.424 (0.404-0.445) |
| **2019** | 0.456 (0.391-0.532) | 0.361 (0.332-0.391) | 0.393 (0.38-0.407) | 0.372 (0.365-0.378) | 0.44 (0.42-0.462) |
| **2020** | 0.528 (0.457-0.61) | 0.424 (0.394-0.458) | 0.447 (0.433-0.462) | 0.4 (0.394-0.407) | 0.517 (0.494-0.54) |
| **65-74 Age Group** | | | | | |
| **1999** | 0.313 (0.253-0.386) | 0.395 (0.361-0.433) | 0.389 (0.377-0.403) | 0.345 (0.34-0.349) | 0.402 (0.379-0.426) |
| **2000** | 0.372 (0.306-0.452) | 0.426 (0.389-0.466) | 0.383 (0.37-0.396) | 0.344 (0.34-0.349) | 0.414 (0.391-0.438) |
| **2001** | 0.366 (0.302-0.442) | 0.393 (0.36-0.43) | 0.396 (0.383-0.409) | 0.349 (0.345-0.354) | 0.442 (0.418-0.467) |
| **2002** | 0.327 (0.268-0.399) | 0.406 (0.371-0.444) | 0.393 (0.38-0.407) | 0.353 (0.348-0.358) | 0.408 (0.385-0.432) |
| **2003** | 0.377 (0.311-0.457) | 0.402 (0.368-0.439) | 0.398 (0.384-0.412) | 0.355 (0.35-0.36) | 0.418 (0.395-0.442) |
| **2004** | 0.366 (0.305-0.438) | 0.413 (0.379-0.45) | 0.406 (0.393-0.421) | 0.356 (0.351-0.361) | 0.403 (0.381-0.427) |
| **2005** | 0.344 (0.287-0.414) | 0.424 (0.39-0.462) | 0.404 (0.39-0.419) | 0.358 (0.353-0.363) | 0.394 (0.373-0.417) |
| **2006** | 0.365 (0.305-0.438) | 0.407 (0.374-0.443) | 0.406 (0.392-0.42) | 0.368 (0.363-0.373) | 0.405 (0.383-0.428) |
| **2007** | 0.382 (0.319-0.457) | 0.398 (0.366-0.434) | 0.416 (0.402-0.43) | 0.368 (0.363-0.374) | 0.422 (0.4-0.446) |
| **2008** | 0.408 (0.346-0.482) | 0.413 (0.381-0.449) | 0.41 (0.396-0.424) | 0.372 (0.367-0.378) | 0.422 (0.4-0.446) |
| **2009** | 0.388 (0.327-0.461) | 0.41 (0.378-0.445) | 0.407 (0.393-0.421) | 0.368 (0.362-0.373) | 0.423 (0.401-0.446) |
| **2010** | 0.406 (0.345-0.478) | 0.423 (0.391-0.458) | 0.416 (0.402-0.43) | 0.372 (0.367-0.377) | 0.437 (0.415-0.46) |
| **2011** | 0.403 (0.342-0.474) | 0.397 (0.367-0.43) | 0.41 (0.396-0.424) | 0.372 (0.367-0.377) | 0.435 (0.413-0.458) |
| **2012** | 0.381 (0.326-0.446) | 0.383 (0.354-0.415) | 0.402 (0.388-0.416) | 0.378 (0.373-0.384) | 0.433 (0.412-0.455) |
| **2013** | 0.422 (0.362-0.492) | 0.389 (0.36-0.42) | 0.405 (0.392-0.418) | 0.379 (0.373-0.384) | 0.442 (0.421-0.464) |
| **2014** | 0.423 (0.365-0.491) | 0.377 (0.35-0.407) | 0.401 (0.388-0.414) | 0.379 (0.374-0.384) | 0.431 (0.411-0.452) |
| **2015** | 0.408 (0.352-0.473) | 0.388 (0.361-0.417) | 0.398 (0.385-0.411) | 0.381 (0.376-0.386) | 0.432 (0.413-0.452) |
| **2016** | 0.417 (0.361-0.482) | 0.375 (0.349-0.402) | 0.402 (0.39-0.415) | 0.391 (0.386-0.397) | 0.449 (0.429-0.47) |
| **2017** | 0.452 (0.394-0.519) | 0.396 (0.37-0.424) | 0.416 (0.404-0.429) | 0.401 (0.396-0.406) | 0.453 (0.433-0.473) |
| **2018** | 0.498 (0.438-0.566) | 0.389 (0.364-0.416) | 0.414 (0.401-0.426) | 0.411 (0.406-0.417) | 0.449 (0.431-0.469) |
| **2019** | 0.477 (0.419-0.544) | 0.404 (0.379-0.431) | 0.427 (0.415-0.439) | 0.422 (0.417-0.427) | 0.45 (0.432-0.469) |
| **2020** | 0.557 (0.493-0.628) | 0.457 (0.431-0.485) | 0.494 (0.481-0.507) | 0.464 (0.458-0.469) | 0.548 (0.528-0.569) |
| **75-84 Age Group** | | | | | |
| **1999** | 0.403 (0.327-0.498) | 0.473 (0.434-0.515) | 0.458 (0.443-0.473) | 0.43 (0.426-0.435) | 0.472 (0.446-0.501) |
| **2000** | 0.438 (0.359-0.536) | 0.494 (0.455-0.536) | 0.449 (0.435-0.465) | 0.434 (0.429-0.439) | 0.47 (0.444-0.497) |
| **2001** | 0.361 (0.292-0.445) | 0.491 (0.454-0.532) | 0.462 (0.447-0.478) | 0.43 (0.425-0.434) | 0.47 (0.445-0.497) |
| **2002** | 0.397 (0.326-0.483) | 0.482 (0.446-0.522) | 0.458 (0.443-0.473) | 0.442 (0.438-0.447) | 0.48 (0.456-0.507) |
| **2003** | 0.472 (0.394-0.566) | 0.49 (0.454-0.528) | 0.464 (0.449-0.48) | 0.439 (0.435-0.444) | 0.457 (0.434-0.482) |
| **2004** | 0.417 (0.345-0.504) | 0.508 (0.471-0.547) | 0.464 (0.449-0.48) | 0.44 (0.435-0.445) | 0.481 (0.457-0.506) |
| **2005** | 0.412 (0.34-0.498) | 0.506 (0.47-0.545) | 0.473 (0.457-0.489) | 0.449 (0.444-0.454) | 0.49 (0.467-0.514) |
| **2006** | 0.479 (0.401-0.572) | 0.509 (0.474-0.548) | 0.469 (0.453-0.485) | 0.451 (0.446-0.456) | 0.473 (0.451-0.497) |
| **2007** | 0.423 (0.353-0.508) | 0.504 (0.47-0.541) | 0.474 (0.458-0.49) | 0.455 (0.449-0.46) | 0.495 (0.472-0.519) |
| **2008** | 0.468 (0.392-0.559) | 0.508 (0.473-0.544) | 0.476 (0.46-0.492) | 0.456 (0.451-0.461) | 0.488 (0.465-0.512) |
| **2009** | 0.462 (0.385-0.553) | 0.492 (0.459-0.528) | 0.477 (0.461-0.493) | 0.455 (0.449-0.46) | 0.472 (0.45-0.496) |
| **2010** | 0.488 (0.412-0.578) | 0.5 (0.467-0.535) | 0.477 (0.461-0.493) | 0.463 (0.458-0.469) | 0.485 (0.463-0.509) |
| **2011** | 0.514 (0.435-0.607) | 0.486 (0.454-0.521) | 0.48 (0.463-0.496) | 0.463 (0.458-0.469) | 0.487 (0.465-0.51) |
| **2012** | 0.474 (0.402-0.559) | 0.476 (0.445-0.509) | 0.475 (0.459-0.492) | 0.462 (0.456-0.467) | 0.496 (0.474-0.519) |
| **2013** | 0.482 (0.41-0.566) | 0.467 (0.437-0.499) | 0.479 (0.463-0.496) | 0.462 (0.456-0.467) | 0.498 (0.476-0.521) |
| **2014** | 0.462 (0.393-0.543) | 0.469 (0.439-0.501) | 0.463 (0.448-0.479) | 0.458 (0.453-0.464) | 0.488 (0.467-0.51) |
| **2015** | 0.49 (0.421-0.57) | 0.455 (0.427-0.486) | 0.459 (0.444-0.475) | 0.461 (0.455-0.466) | 0.492 (0.471-0.514) |
| **2016** | 0.48 (0.412-0.559) | 0.455 (0.427-0.485) | 0.482 (0.466-0.498) | 0.469 (0.463-0.475) | 0.491 (0.47-0.512) |
| **2017** | 0.551 (0.476-0.636) | 0.477 (0.448-0.507) | 0.471 (0.456-0.487) | 0.477 (0.472-0.483) | 0.492 (0.471-0.513) |
| **2018** | 0.51 (0.44-0.591) | 0.478 (0.45-0.508) | 0.472 (0.456-0.487) | 0.488 (0.483-0.494) | 0.496 (0.476-0.517) |
| **2019** | 0.528 (0.457-0.61) | 0.466 (0.439-0.495) | 0.48 (0.465-0.496) | 0.5 (0.494-0.506) | 0.509 (0.488-0.53) |
| **2020** | 0.645 (0.567-0.733) | 0.538 (0.509-0.568) | 0.555 (0.538-0.572) | 0.551 (0.545-0.557) | 0.598 (0.576-0.621) |
| **85+ Age Group** | | | | | |
| **1999** | 0.537 (0.397-0.727) | 0.643 (0.575-0.719) | 0.537 (0.513-0.561) | 0.544 (0.537-0.552) | 0.574 (0.532-0.619) |
| **2000** | 0.474 (0.353-0.637) | 0.628 (0.563-0.699) | 0.53 (0.507-0.554) | 0.544 (0.537-0.551) | 0.556 (0.515-0.599) |
| **2001** | 0.491 (0.369-0.655) | 0.625 (0.562-0.695) | 0.54 (0.517-0.565) | 0.547 (0.54-0.555) | 0.59 (0.549-0.634) |
| **2002** | 0.509 (0.385-0.674) | 0.629 (0.567-0.698) | 0.544 (0.52-0.568) | 0.55 (0.543-0.557) | 0.557 (0.519-0.598) |
| **2003** | 0.426 (0.315-0.576) | 0.629 (0.57-0.696) | 0.538 (0.514-0.562) | 0.553 (0.546-0.56) | 0.56 (0.522-0.602) |
| **2004** | 0.498 (0.376-0.659) | 0.614 (0.557-0.677) | 0.533 (0.509-0.558) | 0.552 (0.545-0.56) | 0.545 (0.508-0.586) |
| **2005** | 0.498 (0.374-0.663) | 0.608 (0.554-0.668) | 0.55 (0.526-0.575) | 0.557 (0.55-0.564) | 0.553 (0.517-0.592) |
| **2006** | 0.548 (0.421-0.712) | 0.583 (0.531-0.639) | 0.549 (0.525-0.574) | 0.56 (0.553-0.567) | 0.579 (0.542-0.619) |
| **2007** | 0.591 (0.465-0.752) | 0.583 (0.533-0.637) | 0.554 (0.53-0.579) | 0.561 (0.554-0.568) | 0.565 (0.53-0.603) |
| **2008** | 0.491 (0.377-0.64) | 0.591 (0.542-0.644) | 0.568 (0.544-0.594) | 0.557 (0.55-0.564) | 0.564 (0.529-0.601) |
| **2009** | 0.578 (0.449-0.745) | 0.585 (0.538-0.635) | 0.563 (0.538-0.588) | 0.557 (0.55-0.564) | 0.557 (0.523-0.592) |
| **2010** | 0.574 (0.455-0.723) | 0.581 (0.535-0.631) | 0.551 (0.527-0.575) | 0.561 (0.554-0.568) | 0.562 (0.529-0.597) |
| **2011** | 0.603 (0.478-0.761) | 0.565 (0.521-0.612) | 0.567 (0.543-0.592) | 0.566 (0.559-0.573) | 0.579 (0.546-0.613) |
| **2012** | 0.621 (0.492-0.784) | 0.575 (0.532-0.62) | 0.569 (0.545-0.593) | 0.567 (0.56-0.574) | 0.561 (0.531-0.593) |
| **2013** | 0.568 (0.455-0.709) | 0.567 (0.526-0.612) | 0.534 (0.512-0.558) | 0.563 (0.556-0.57) | 0.566 (0.536-0.598) |
| **2014** | 0.619 (0.498-0.769) | 0.584 (0.543-0.628) | 0.529 (0.507-0.553) | 0.553 (0.546-0.56) | 0.551 (0.523-0.581) |
| **2015** | 0.543 (0.439-0.673) | 0.55 (0.512-0.59) | 0.535 (0.513-0.558) | 0.551 (0.544-0.557) | 0.564 (0.536-0.594) |
| **2016** | 0.551 (0.442-0.687) | 0.533 (0.497-0.572) | 0.533 (0.511-0.557) | 0.555 (0.548-0.562) | 0.555 (0.527-0.583) |
| **2017** | 0.552 (0.444-0.686) | 0.556 (0.52-0.594) | 0.518 (0.496-0.541) | 0.567 (0.56-0.574) | 0.559 (0.533-0.587) |
| **2018** | 0.563 (0.457-0.693) | 0.542 (0.507-0.579) | 0.535 (0.513-0.558) | 0.573 (0.566-0.58) | 0.578 (0.551-0.606) |
| **2019** | 0.643 (0.526-0.784) | 0.547 (0.513-0.583) | 0.536 (0.514-0.559) | 0.582 (0.575-0.59) | 0.568 (0.543-0.595) |
| **2020** | 0.661 (0.547-0.799) | 0.607 (0.571-0.645) | 0.622 (0.599-0.647) | 0.641 (0.633-0.648) | 0.643 (0.616-0.672) |

| **Supplemental Table 5** CVD Burden in Malignant Neoplasm-Related Deaths Reporting Odds Ratio Stratified by Census Place of Death in the Unites States, 1999-2020 | | | | | | | |
| --- | --- | --- | --- | --- | --- | --- | --- |
| **Deaths and Reporting Odds Ratio (95% CI)** | | | | | | | |
| **Cohort** | **Cancer and CVD Deaths (A)** | **Total Cancer Deaths (B)** | **Total CVD Deaths (C)** | **Total Non-Cancer Deaths (D)** | **A/B** | **C/D** | **ROR** |
| **15-24 Age Group** | | | | | | | |
| Medical Facility | 5070 | 21503 | 46946 | 288062 | 0.236 | 0.163 | 1.447 |
| Decedent's home | 1196 | 11787 | 12048 | 127152 | 0.101 | 0.095 | 1.071 |
| Hospice facility | 97 | 1271 | 318 | 1595 | 0.076 | 0.199 | 0.383 |
| Nursing home/long term care | 61 | 530 | 710 | 2930 | 0.115 | 0.242 | 0.475 |
| Other/Unknown | 138 | 1166 | 5348 | 240483 | 0.118 | 0.022 | 5.322 |
| **25-34 Age Group** | | | | | | | |
| Medical Facility | 9997 | 44192 | 120134 | 411993 | 0.226 | 0.292 | 0.776 |
| Decedent's home | 2713 | 28101 | 44760 | 261051 | 0.097 | 0.171 | 0.563 |
| Hospice facility | 446 | 5341 | 1336 | 5293 | 0.084 | 0.252 | 0.331 |
| Nursing home/long term care | 369 | 2742 | 2742 | 9574 | 0.135 | 0.286 | 0.470 |
| Other/Unknown | 462 | 4549 | 14710 | 270207 | 0.102 | 0.054 | 1.866 |
| **35-44 Age Group** | | | | | | | |
| Medical Facility | 30208 | 134125 | 340976 | 721485 | 0.225 | 0.473 | 0.477 |
| Decedent's home | 11898 | 110035 | 147746 | 441732 | 0.108 | 0.334 | 0.323 |
| Hospice facility | 1898 | 20174 | 4062 | 13988 | 0.094 | 0.290 | 0.324 |
| Nursing home/long term care | 2186 | 15483 | 11026 | 32287 | 0.141 | 0.341 | 0.413 |
| Other/Unknown | 1779 | 17145 | 39535 | 269564 | 0.104 | 0.147 | 0.707 |
| **45-54 Age Group** | | | | | | | |
| Medical Facility | 106961 | 429048 | 885792 | 1470353 | 0.249 | 0.602 | 0.414 |
| Decedent's home | 54513 | 419255 | 453677 | 869757 | 0.130 | 0.522 | 0.249 |
| Hospice facility | 8711 | 78172 | 15319 | 43508 | 0.111 | 0.352 | 0.316 |
| Nursing home/long term care | 12801 | 72928 | 47658 | 104481 | 0.176 | 0.456 | 0.385 |
| Other/Unknown | 7302 | 58216 | 95973 | 323964 | 0.125 | 0.296 | 0.423 |
| **55-64 Age Group** | | | | | | | |
| Medical Facility | 269843 | 919704 | 1642859 | 2411695 | 0.293 | 0.681 | 0.431 |
| Decedent's home | 169510 | 1003610 | 884758 | 1329860 | 0.169 | 0.665 | 0.254 |
| Hospice facility | 26934 | 195554 | 45981 | 103321 | 0.138 | 0.445 | 0.309 |
| Nursing home/long term care | 46867 | 205917 | 167024 | 291954 | 0.228 | 0.572 | 0.398 |
| Other/Unknown | 19994 | 121749 | 140186 | 301675 | 0.164 | 0.465 | 0.353 |
| **65-74 Age Group** | | | | | | | |
| Medical Facility | 443687 | 1270669 | 2510441 | 3486925 | 0.349 | 0.720 | 0.485 |
| Decedent's home | 323353 | 1487497 | 1185867 | 1652812 | 0.217 | 0.717 | 0.303 |
| Hospice facility | 48661 | 273717 | 108268 | 202893 | 0.178 | 0.534 | 0.333 |
| Nursing home/long term care | 115864 | 402846 | 512114 | 813743 | 0.288 | 0.629 | 0.457 |
| Other/Unknown | 35835 | 176098 | 152671 | 267088 | 0.203 | 0.572 | 0.356 |
| **75-84 Age Group** | | | | | | | |
| Medical Facility | 492047 | 1198084 | 3640625 | 4984408 | 0.411 | 0.730 | 0.562 |
| Decedent's home | 426322 | 1563255 | 1702129 | 2351387 | 0.273 | 0.724 | 0.377 |
| Hospice facility | 59250 | 268190 | 236116 | 400263 | 0.221 | 0.590 | 0.375 |
| Nursing home/long term care | 247810 | 707285 | 1686726 | 2597245 | 0.350 | 0.649 | 0.540 |
| Other/Unknown | 55258 | 220058 | 265355 | 433047 | 0.251 | 0.613 | 0.410 |
| **85+ Age Group** | | | | | | | |
| Medical Facility | 251642 | 522351 | 3290364 | 4549782 | 0.482 | 0.723 | 0.666 |
| Decedent's home | 297897 | 856139 | 2153245 | 2897641 | 0.348 | 0.743 | 0.468 |
| Hospice facility | 44212 | 161049 | 388249 | 607046 | 0.275 | 0.640 | 0.429 |
| Nursing home/long term care | 311638 | 730385 | 3879260 | 5749665 | 0.427 | 0.675 | 0.632 |
| Other/Unknown | 51808 | 157213 | 494359 | 747729 | 0.330 | 0.661 | 0.498 |
